# Supplementary material for: A comparison of classical and machine learning-based phenotype prediction methods on simulated data and three plant species
Source: PubMed Central journal article supplement (PMC9673477; doi:10.3389/fpls.2022.932512), 2022-11-04
Supplement: DataSheet_1.pdf [file DataSheet_1.pdf]

## ***Supplementary Material***

### **A comparison of classical and machine learning-based phenotype prediction methods on simulated data and three plant species**

Maura John<sup>1,2,†</sup>, Florian Haselbeck<sup>1,2,†</sup>, Rupashree Dass<sup>3</sup>, Christoph Malisi<sup>3</sup>, Patrizia Ricca<sup>3</sup>, Christian Dreischer<sup>3</sup>, Sebastian J. Schultheiss<sup>3</sup> and Dominik G. Grimm<sup>1,2,4,\*</sup>

<sup>1</sup> Technical University of Munich, Campus Straubing for Biotechnology and Sustainability, Bioinformatics, Straubing, Germany

<sup>2</sup> Weihenstephan-Triesdorf University of Applied Sciences, Straubing, Germany

<sup>3</sup> Computomics GmbH, Tübingen, Germany

<sup>4</sup> Technical University of Munich, Department of Informatics, Garching, Germany

<sup>†</sup>These authors have contributed equally to this work and share first authorship.

\* Correspondence: Dominik G. Grimm, TUM Campus Straubing for Biotechnology and Sustainability & Weihenstephan-Triesdorf University of Applied Sciences, Petersgasse 18, 94315 Straubing, dominik.grimm@hswt.de

# 1 SUPPLEMENTARY TABLES

**Table S1. Dataset statistics for all real-world phenotypes:** For each real-world phenotype, the table shows the available number of samples and the number of SNPs after removing duplicates in additive as well as one-hot encoding. Further the overall mean, standard deviation, minimum and maximum are given.

| phenotype          | #samples | #SNPs (additive) | #SNPs (one-hot) | mean   | sd     | min   | max    |        |
|--------------------|----------|------------------|-----------------|--------|--------|-------|--------|--------|
| <i>A. thaliana</i> | DTF1     | 936              | 44434           | 45205  | 64.49  | 26.13 | 23.5   | 139.0  |
|                    | RL       | 850              | 43803           | 666436 | 42.17  | 16.85 | 7.50   | 99.0   |
|                    | Diameter | 656              | 44189           | 45193  | 15.32  | 3.25  | 6.00   | 24.00  |
|                    | FT10     | 1058             | 45841           | 46366  | 83.46  | 17.88 | 50.75  | 157.50 |
| corn               | PWC      | 1797             | 7192            | 8373   | 20.89  | 0.90  | 17.50  | 24.80  |
|                    | Yield    | 1411             | 7100            | 8350   | 234.19 | 22.70 | 130.50 | 299.20 |
| soy                | MatG     | 457              | 598             | 608    | 7.46   | 0.53  | 6.50   | 8.60   |
|                    | Yield    | 456              | 598             | 608    | 72.64  | 5.25  | 53.51  | 84.61  |
|                    | Height   | 460              | 598             | 608    | 89.52  | 14.54 | 59.57  | 131.28 |

**Table S2. Hyperparameters and ranges optimized for LASSO, Elastic Net SVR, RF and XGB:** Numbers in square brackets reflect a list of potential values or the lower respective upper bound, with a step size of 1 for integer values. In some cases, specific step sizes  $\Delta$  were used.

| Hyperparameter    | Values                                                                                                 | Notes                                                         |
|-------------------|--------------------------------------------------------------------------------------------------------|---------------------------------------------------------------|
| <b>LASSO</b>      |                                                                                                        |                                                               |
| alpha             | $[10^{-3}, 10^3]$                                                                                      | weighting factor of the L1-regularization term                |
| <b>ElasticNet</b> |                                                                                                        |                                                               |
| alpha             | $[10^{-3}, 10^3]$                                                                                      | weighting factor of the regularization terms                  |
| l1_ratio          | $[0.05, 0.95]$ with $\Delta = 0.05$                                                                    | trade off between L1- and L2-regularization                   |
| <b>SVR</b>        |                                                                                                        |                                                               |
| kernel            | ['linear', 'poly', 'rbf']                                                                              | kernel function to use                                        |
| C                 | $[10^{-3}, 10^3]$                                                                                      | regularization factor                                         |
| degree            | [1, 5]                                                                                                 | polynomial degree of kernel function (if kernel is 'poly')    |
| gamma             | $[10^{-3}, 10^3]$                                                                                      | kernel coefficient (if kernel is 'rbf' or 'poly')             |
| <b>RF</b>         |                                                                                                        |                                                               |
| n_estimators      | [50, 100, 250, 500, 750, 1000, 1250, 1500, 1750, 2000, 2250, 2500, 2750, 3000, 3500, 4000, 4500, 5000] | number of trees in the ensemble                               |
| min_samples_split | $[0.005, 0.2]$ with $\Delta = 0.005$                                                                   | minimum ratio of the number of samples to split a node        |
| max_depth         | $[2, 50]$ with $\Delta = 2$                                                                            | maximum depth of a tree                                       |
| min_samples_leaf  | $[0.005, 0.2]$ with $\Delta = 0.005$                                                                   | minimum ratio of the number of samples at a leaf node         |
| max_features      | ['sqrt', 'log2']                                                                                       | number of features to consider at determining best split      |
| <b>XGB</b>        |                                                                                                        |                                                               |
| n_estimators      | [50, 100, 250, 500, 750, 1000, 1250, 1500, 1750, 2000, 2250, 2500, 2750, 3000]                         | number of trees in the ensemble                               |
| max_depth         | $[2, 10]$ with $\Delta = 1$                                                                            | maximum depth of a tree                                       |
| learning_rate     | $[0.025, 0.3]$ with $\Delta = 0.025$                                                                   | boosting learning rate                                        |
| gamma             | $[0, 1000]$ with $\Delta = 10$                                                                         | minimum loss reduction for a further partition on a leaf node |
| subsample         | $[0.05, 0.8]$ with $\Delta = 0.05$                                                                     | subsample ratio of training instances for tree construction   |
| colsample_bytree  | $[0.05, 0.8]$ with $\Delta = 0.05$                                                                     | ratio of features to use for each tree                        |
| reg_alpha         | $[0, 1000]$ with $\Delta = 10$                                                                         | L1-regularization term on weights                             |

**Table S3. Hyperparameters and ranges optimized for MLP, CNN and LCNN:** Numbers in square brackets reflect a list of potential values or the lower respective upper bound, with a step size of 1 for integer values. In some cases, specific step sizes  $\Delta$  were used.

| Hyperparameter   | Values                                                                                                                                                           | Notes                                                                                                           |
|------------------|------------------------------------------------------------------------------------------------------------------------------------------------------------------|-----------------------------------------------------------------------------------------------------------------|
| <i>MLP</i>       |                                                                                                                                                                  |                                                                                                                 |
| dropout          | [0, 0.5] with $\Delta = 0.1$                                                                                                                                     | dropout rate for dropout layers                                                                                 |
| act_function     | ['relu', 'tanh']                                                                                                                                                 | activation function to use                                                                                      |
| learning_rate    | $[10^{-6}, 10^{-5}, 10^{-4}, 10^{-3}, 10^{-2}, 10^{-1}]$                                                                                                         | learning rate of the Adam optimizer                                                                             |
| early_stop_pat   | [0, 20] with $\Delta = 5$                                                                                                                                        | epochs without improvement needed for early stopping                                                            |
| n_layers         | [1, 5]                                                                                                                                                           | number of building blocks consisting of fully-connected, batch normalization and dropout layer                  |
| n_init_units_fac | [0.1, 0.7] with $\Delta = 0.05$ if $n_{features} \leq 20.000$<br>[0.1, 0.3] with $\Delta = 0.01$ if $n_{features} > 20.000$                                      | number of neurons in the first fully-connected layer in relation to the number of input features                |
| perc_dec         | [0.1, 0.5] with $\Delta = 0.05$ if $n_{features} \leq 20.000$                                                                                                    | percentage decrease of number of neurons per building block                                                     |
| <i>CNN</i>       |                                                                                                                                                                  |                                                                                                                 |
| dropout          | [0, 0.5] with $\Delta = 0.1$                                                                                                                                     | dropout rate for dropout layers                                                                                 |
| act_function     | ['relu', 'tanh']                                                                                                                                                 | activation function to use                                                                                      |
| learning_rate    | $[10^{-6}, 10^{-5}, 10^{-4}, 10^{-3}, 10^{-2}, 10^{-1}]$                                                                                                         | learning rate of the Adam optimizer                                                                             |
| early_stop_pat   | [0, 20] with $\Delta = 5$                                                                                                                                        | epochs without improvement needed for early stopping                                                            |
| n_layers         | [1, 3]                                                                                                                                                           | number of building blocks consisting of convolutional, batch normalization and dropout layer                    |
| stride_perc      | [0.5, 1] with $\Delta = 0.1$                                                                                                                                     | stride in relation to the kernel size                                                                           |
| kernel_size      | [2, 8] if $n_{features} \leq 15.000$<br>[4, 10] with $\Delta = 2$ if $15.000 < n_{features} \leq 50.000$<br>[8, 14] with $\Delta = 2$ if $n_{features} > 50.000$ | size of the convolutional and max pooling kernels                                                               |
| n_units_fac_lin  | [0.2, 1] with $\Delta = 0.05$ if $n_{features} \leq 15.000$<br>[0.2, 0.5] with $\Delta = 2$ if $n_{features} > 15.000$                                           | neurons in the fully-connected layer after the convolutional network part in relation to the hidden output size |
| <i>LCNN</i>      |                                                                                                                                                                  |                                                                                                                 |
| dropout          | [0, 0.5] with $\Delta = 0.1$                                                                                                                                     | dropout rate for dropout layers                                                                                 |
| learning_rate    | $[10^{-6}, 10^{-5}, 10^{-4}, 10^{-3}, 10^{-2}, 10^{-1}]$                                                                                                         | learning rate of the Adam optimizer                                                                             |
| early_stop_pat   | [0, 10] with $\Delta = 10$                                                                                                                                       | epochs without improvement needed for early stopping                                                            |
| stride_perc      | [0.5, 1] with $\Delta = 0.1$                                                                                                                                     | stride in relation to the kernel size                                                                           |
| kernel_size      | [6, 14] with $\Delta = 2$ if $n_{features} \leq 15.000$<br>[3, 7] with $\Delta = 1$ if $n_{features} > 20.000$                                                   | size of the locally connected kernels, for $n_{features} > 20.000$ as exponent to the basis 2                   |
| n_layers         | [1, 3]                                                                                                                                                           | number of building blocks consisting of the fully-connected part after the locally connected layer              |
| n_units_fac_lin  | [0.1, 0.7] with $\Delta = 0.05$                                                                                                                                  | neurons in the fully-connected layer after the convolutional network part in relation to the hidden output size |
| perc_dec         | [0.2, 0.5] with $\Delta = 0.05$                                                                                                                                  | percentage decrease of number of neurons per building block                                                     |

**Table S4. Results of Bayes A, Bayes B and Bayes C for synthetic data:** For each heritability ( $h = 0.7$ ,  $h = 0.85$ ,  $h = 0.95$ ) and simulation setting (A to L), the table shows the explained variances (mean and standard deviation on outer folds of nested cross-validation) achieved by the corresponding model.

|                  | Simulation       | Bayes A       | Bayes B       | Bayes C       |
|------------------|------------------|---------------|---------------|---------------|
| $h = 0.7$        | A (#100)         | 0.099 ± 0.011 | 0.116 ± 0.008 | 0.096 ± 0.011 |
|                  | B (#500)         | 0.450 ± 0.059 | 0.446 ± 0.055 | 0.300 ± 0.076 |
|                  | C (#1000)        | 0.495 ± 0.034 | 0.492 ± 0.036 | 0.424 ± 0.062 |
|                  | D (#2000)        | 0.507 ± 0.013 | 0.516 ± 0.011 | 0.483 ± 0.011 |
|                  | E (MultWeak)     | 0.354 ± 0.004 | 0.353 ± 0.006 | 0.266 ± 0.004 |
|                  | F (MultStrong)   | 0.231 ± 0.002 | 0.236 ± 0.005 | 0.223 ± 0.009 |
|                  | G (SkewedWeak)   | 0.512 ± 0.034 | 0.509 ± 0.033 | 0.432 ± 0.034 |
|                  | H (SkewedStrong) | 0.479 ± 0.008 | 0.483 ± 0.010 | 0.430 ± 0.007 |
|                  | I (Add5)         | 0.369 ± 0.048 | 0.384 ± 0.049 | 0.354 ± 0.047 |
|                  | J (Add20)        | 0.393 ± 0.021 | 0.400 ± 0.018 | 0.380 ± 0.018 |
|                  | K (Add50)        | 0.551 ± 0.029 | 0.549 ± 0.030 | 0.548 ± 0.029 |
|                  | L (Add100)       | 0.477 ± 0.037 | 0.478 ± 0.035 | 0.477 ± 0.035 |
|                  | $h = 0.85$       | A (#100)      | 0.278 ± 0.120 | 0.275 ± 0.121 |
| B (#500)         |                  | 0.489 ± 0.048 | 0.437 ± 0.115 | 0.338 ± 0.027 |
| C (#1000)        |                  | 0.561 ± 0.061 | 0.560 ± 0.059 | 0.489 ± 0.070 |
| D (#2000)        |                  | 0.659 ± 0.004 | 0.674 ± 0.003 | 0.628 ± 0.007 |
| E (MultWeak)     |                  | 0.442 ± 0.032 | 0.439 ± 0.029 | 0.382 ± 0.005 |
| F (MultStrong)   |                  | 0.177 ± 0.043 | 0.184 ± 0.047 | 0.174 ± 0.051 |
| G (SkewedWeak)   |                  | 0.561 ± 0.023 | 0.559 ± 0.029 | 0.520 ± 0.036 |
| H (SkewedStrong) |                  | 0.611 ± 0.009 | 0.612 ± 0.009 | 0.493 ± 0.013 |
| I (Add5)         |                  | 0.633 ± 0.012 | 0.638 ± 0.006 | 0.576 ± 0.032 |
| J (Add20)        |                  | 0.472 ± 0.037 | 0.483 ± 0.037 | 0.463 ± 0.038 |
| K (Add50)        |                  | 0.590 ± 0.021 | 0.593 ± 0.022 | 0.589 ± 0.021 |
| L (Add100)       |                  | 0.568 ± 0.035 | 0.572 ± 0.034 | 0.564 ± 0.035 |
| $h = 0.95$       |                  | A (#100)      | 0.214 ± 0.061 | 0.216 ± 0.071 |
|                  | B (#500)         | 0.531 ± 0.047 | 0.533 ± 0.047 | 0.465 ± 0.030 |
|                  | C (#1000)        | 0.656 ± 0.011 | 0.659 ± 0.007 | 0.534 ± 0.033 |
|                  | D (#2000)        | 0.736 ± 0.012 | 0.758 ± 0.013 | 0.716 ± 0.014 |
|                  | E (MultWeak)     | 0.508 ± 0.019 | 0.513 ± 0.019 | 0.470 ± 0.020 |
|                  | F (MultStrong)   | 0.567 ± 0.049 | 0.571 ± 0.048 | 0.557 ± 0.053 |
|                  | G (SkewedWeak)   | 0.637 ± 0.006 | 0.636 ± 0.009 | 0.561 ± 0.012 |
|                  | H (SkewedStrong) | 0.640 ± 0.026 | 0.650 ± 0.024 | 0.549 ± 0.049 |
|                  | I (Add5)         | 0.517 ± 0.028 | 0.523 ± 0.030 | 0.477 ± 0.015 |
|                  | J (Add20)        | 0.680 ± 0.038 | 0.707 ± 0.038 | 0.687 ± 0.044 |
|                  | K (Add50)        | 0.571 ± 0.036 | 0.577 ± 0.037 | 0.566 ± 0.034 |
|                  | L (Add100)       | 0.639 ± 0.017 | 0.640 ± 0.024 | 0.640 ± 0.018 |

**Table S5. Results of Bayes A, Bayes B and Bayes C for real-world data:** For each species-phenotype combination, the table shows the explained variances (mean and standard deviation on outer folds of nested cross-validation) achieved by the corresponding model.

| Phenotype          |          | Bayes A        | Bayes B        | Bayes C        |
|--------------------|----------|----------------|----------------|----------------|
| <i>A. thaliana</i> | DTF1     | 0.628 ± 0.028  | 0.629 ± 0.028  | 0.629 ± 0.030  |
|                    | RL       | 0.520 ± 0.007  | 0.518 ± 0.008  | 0.516 ± 0.005  |
|                    | Diameter | -0.030 ± 0.014 | -0.009 ± 0.012 | -0.000 ± 0.009 |
|                    | FT10     | 0.647 ± 0.020  | 0.649 ± 0.019  | 0.645 ± 0.021  |
| corn               | PWC      | 0.481 ± 0.015  | 0.482 ± 0.015  | 0.481 ± 0.015  |
|                    | Yield    | 0.276 ± 0.007  | 0.277 ± 0.006  | 0.276 ± 0.009  |
| soy                | MatG     | 0.587 ± 0.050  | 0.588 ± 0.051  | 0.586 ± 0.046  |
|                    | Yield    | 0.126 ± 0.014  | 0.118 ± 0.032  | 0.128 ± 0.017  |
|                    | Height   | 0.474 ± 0.065  | 0.463 ± 0.067  | 0.470 ± 0.059  |

**Table S6. Analysis of feature importances of LASSO, ElasticNet, RR-BLUP, Bayes B, RF and XGB for synthetic data with  $h = 0.7$ :** For each simulation configuration and model, the table shows the number of SNPs deemed as important feature for at least one of the outer folds in the nested cross-validation, both, without and with filtering out those which are smaller than one percent of the largest feature importance. Furthermore, the number of background SNPs within the important features are stated as well as the ratio between the found background SNPs and the total amount of important features as percentage value in parentheses, i.e. the True Positive Rate (TPR), again without and with filtering. For the causal SNPs, we show the number of causal SNPs deemed important by each algorithm and in brackets the ranking of the causal SNPs within the important features. For configurations *J*, *K* and *L*, we give the number of causal SNPs within the *k* (total number of causal SNPs) most important features.

Where *A*: #100, *B*: #500, *C*: #1000, *D*: #2000, *E*: MultWeak, *F*: MultStrong, *G*: SkewedWeak, *H*: SkewedStrong, *I*: Add5, *J*: Add20, *K*: Add50, *L*: Add100

| Sim                       | LASSO                |           | ElasticNet            |           | RR-BLUP             |           | Bayes B                |           | RF                    |           | XGB                        |           |
|---------------------------|----------------------|-----------|-----------------------|-----------|---------------------|-----------|------------------------|-----------|-----------------------|-----------|----------------------------|-----------|
|                           | no filter            | 1% filter | no filter             | 1% filter | no filter           | 1% filter | no filter              | 1% filter | no filter             | 1% filter | no filter                  | 1% filter |
| <b>important features</b> |                      |           |                       |           |                     |           |                        |           |                       |           |                            |           |
| <i>A</i>                  | 38                   | 32        | 935                   | 841       | 2099                | 2099      | 2333                   | 2333      | 2052                  | 2048      | 2                          | 2         |
| <i>B</i>                  | 95                   | 43        | 102                   | 49        | 2122                | 2122      | 2211                   | 4         | 2460                  | 1057      | 300                        | 203       |
| <i>C</i>                  | 213                  | 79        | 221                   | 84        | 2159                | 2159      | 2195                   | 6         | 1932                  | 593       | 1403                       | 1401      |
| <i>D</i>                  | 427                  | 160       | 653                   | 243       | 2137                | 2137      | 2074                   | 109       | 2357                  | 140       | 2274                       | 1176      |
| <i>E</i>                  | 347                  | 218       | 1973                  | 1578      | 2125                | 2125      | 2156                   | 91        | 2094                  | 2094      | 523                        | 523       |
| <i>F</i>                  | 144                  | 114       | 1650                  | 1441      | 2125                | 2125      | 2114                   | 837       | 2228                  | 2228      | 2310                       | 2310      |
| <i>G</i>                  | 273                  | 108       | 274                   | 105       | 2095                | 2095      | 2137                   | 8         | 2251                  | 743       | 2460                       | 1591      |
| <i>H</i>                  | 177                  | 80        | 182                   | 83        | 2120                | 2120      | 2108                   | 17        | 2198                  | 870       | 2215                       | 1471      |
| <i>I</i>                  | 345                  | 250       | 1451                  | 942       | 2094                | 2094      | 2156                   | 411       | 1938                  | 1938      | 2139                       | 2093      |
| <i>J</i>                  | 159                  | 131       | 977                   | 755       | 2076                | 2076      | 2139                   | 1151      | 2080                  | 2080      | 1764                       | 1100      |
| <i>K</i>                  | 307                  | 284       | 2107                  | 2099      | 2093                | 2093      | 2156                   | 2156      | 2374                  | 1363      | 2074                       | 634       |
| <i>L</i>                  | 288                  | 268       | 2003                  | 1810      | 2066                | 2066      | 2101                   | 2101      | 2202                  | 2202      | 1959                       | 442       |
| <b>background SNPs</b>    |                      |           |                       |           |                     |           |                        |           |                       |           |                            |           |
| <i>A</i>                  | 10 (26%)             | 10 (31%)  | 112 (12%)             | 103 (12%) | 229 (11%)           | 229 (11%) | 262 (11%)              | 262 (11%) | 211 (10%)             | 210 (10%) | 1 (50%)                    | 1 (50%)   |
| <i>B</i>                  | 14 (15%)             | 11 (26%)  | 17 (17%)              | 11 (22%)  | 239 (11%)           | 239 (11%) | 252 (11%)              | 1 (25%)   | 294 (12%)             | 129 (12%) | 48 (16%)                   | 36 (18%)  |
| <i>C</i>                  | 47 (22%)             | 21 (27%)  | 47 (21%)              | 24 (29%)  | 234 (11%)           | 234 (11%) | 269 (12%)              | 3 (50%)   | 223 (12%)             | 73 (12%)  | 185 (13%)                  | 185 (13%) |
| <i>D</i>                  | 87 (20%)             | 60 (38%)  | 116 (18%)             | 76 (31%)  | 244 (11%)           | 244 (11%) | 273 (13%)              | 50 (46%)  | 276 (12%)             | 21 (15%)  | 306 (13%)                  | 183 (16%) |
| <i>E</i>                  | 53 (15%)             | 37 (17%)  | 218 (11%)             | 183 (12%) | 248 (12%)           | 248 (12%) | 226 (10%)              | 18 (20%)  | 249 (12%)             | 249 (12%) | 91 (17%)                   | 91 (17%)  |
| <i>F</i>                  | 27 (19%)             | 24 (21%)  | 204 (12%)             | 182 (13%) | 231 (11%)           | 231 (11%) | 243 (11%)              | 103 (12%) | 247 (11%)             | 247 (11%) | 269 (12%)                  | 269 (12%) |
| <i>G</i>                  | 46 (17%)             | 20 (19%)  | 45 (16%)              | 18 (17%)  | 231 (11%)           | 231 (11%) | 250 (12%)              | 1 (12%)   | 244 (11%)             | 75 (10%)  | 282 (11%)                  | 181 (11%) |
| <i>H</i>                  | 29 (16%)             | 16 (20%)  | 30 (16%)              | 16 (19%)  | 234 (11%)           | 234 (11%) | 233 (11%)              | 5 (29%)   | 242 (11%)             | 98 (11%)  | 251 (11%)                  | 174 (12%) |
| <i>I</i>                  | 45 (13%)             | 33 (13%)  | 164 (11%)             | 108 (11%) | 239 (11%)           | 239 (11%) | 239 (11%)              | 60 (15%)  | 217 (11%)             | 217 (11%) | 259 (12%)                  | 256 (12%) |
| <i>J</i>                  | 40 (25%)             | 34 (26%)  | 123 (13%)             | 102 (14%) | 232 (11%)           | 232 (11%) | 237 (11%)              | 143 (12%) | 248 (12%)             | 248 (12%) | 216 (12%)                  | 145 (13%) |
| <i>K</i>                  | 44 (14%)             | 40 (14%)  | 220 (10%)             | 220 (10%) | 246 (12%)           | 246 (12%) | 219 (10%)              | 219 (10%) | 252 (11%)             | 144 (11%) | 245 (12%)                  | 74 (12%)  |
| <i>L</i>                  | 46 (16%)             | 43 (16%)  | 208 (10%)             | 186 (10%) | 226 (11%)           | 226 (11%) | 217 (10%)              | 217 (10%) | 220 (10%)             | 220 (10%) | 189 (10%)                  | 55 (12%)  |
| <b>causal SNPs</b>        |                      |           |                       |           |                     |           |                        |           |                       |           |                            |           |
| <i>A</i>                  | 1/1 [1]              |           | 1/1 [1]               |           | 0/1 [-]             |           | 1/1 [2]                |           | 1/1 [1]               |           | 1/1 [1]                    |           |
| <i>B</i>                  | 1/1 [1]              |           | 1/1 [1]               |           | 0/1 [-]             |           | 1/1 [1]                |           | 1/1 [1]               |           | 1/1 [1]                    |           |
| <i>C</i>                  | 1/1 [1]              |           | 1/1 [1]               |           | 0/1 [-]             |           | 1/1 [1]                |           | 1/1 [1]               |           | 1/1 [2]                    |           |
| <i>D</i>                  | 1/1 [1]              |           | 1/1 [1]               |           | 0/1 [-]             |           | 1/1 [1]                |           | 1/1 [1]               |           | 1/1 [1]                    |           |
| <i>E</i>                  | 2/2 [1,2]            |           | 2/2 [1,2]             |           | 0/2 [-]             |           | 2/2 [1, 2]             |           | 2/2 [1, 2]            |           | 2/2 [4, 6]                 |           |
| <i>F</i>                  | 2/2 [1,3]            |           | 2/2 [1,2]             |           | 0/2 [-]             |           | 2/2 [1, 2]             |           | 2/2 [2, 24]           |           | 2/2 [1, 51]                |           |
| <i>G</i>                  | 1/1 [1]              |           | 1/1 [1]               |           | 0/1 [-]             |           | 1/1 [1]                |           | 1/1 [1]               |           | 1/1 [4]                    |           |
| <i>H</i>                  | 1/1 [1]              |           | 1/1 [1]               |           | 0/1 [-]             |           | 1/1 [1]                |           | 1/1 [2]               |           | 1/1 [1]                    |           |
| <i>I</i>                  | 4/5 [1,2,26,28]      |           | 5/5 [1,2,13,36,926]   |           | 0/5 [-]             |           | 5/5 [1, 2, 3, 49, 696] |           | 5/5 [1, 2, 4, 6, 766] |           | 5/5 [52, 74, 77, 142, 651] |           |
| <i>J</i>                  | 16/20 [12 in top20]  |           | 19/20 [12 in top20]   |           | 0/20 [0 in top20]   |           | 20/20 [14 in top20]    |           | 12/20 [0 in top20]    |           | 16/20 [0 in top20]         |           |
| <i>K</i>                  | 17/50 [6 in top50]   |           | 43/50 [10 in top50]   |           | 0/50 [0 in top50]   |           | 41/50 [10 in top50]    |           | 26/50 [1 in top50]    |           | 28/50 [2 in top50]         |           |
| <i>L</i>                  | 20/100 [8 in top100] |           | 63/100 [14 in top100] |           | 7/100 [0 in top100] |           | 65/100 [15 in top100]  |           | 46/100 [3 in top100]  |           | 27/100 [6 in top100]       |           |

**Table S7. Analysis of feature importances of LASSO, ElasticNet, RR-BLUP, Bayes B, RF and XGB for synthetic data with  $h = 0.85$ :** For each simulation configuration and model, the table shows the number of SNPs deemed as important feature for at least one of the outer folds in the nested cross-validation, both, without and with filtering out those which are smaller than one percent of the largest feature importance. Furthermore, the number of background SNPs within the important features are stated as well as the ratio between the found background SNPs and the total amount of important features as percentage value in parentheses, i.e. the True Positive Rate (TPR), again without and with filtering. For the causal SNPs, we show the number of causal SNPs deemed important by each algorithm and in brackets the ranking of the causal SNPs within the important features. For configurations *J*, *K* and *L*, we give the number of causal SNPs within the *k* (total number of causal SNPs) most important features.

Where *A*: #100, *B*: #500, *C*: #1000, *D*: #2000, *E*: MultWeak, *F*: MultStrong, *G*: SkewedWeak, *H*: SkewedStrong, *I*: Add5, *J*: Add20, *K*: Add50, *L*: Add100

| Sim                       | LASSO                 |           | ElasticNet            |           | RR-BLUP             |           | Bayes B               |           | RF                   |           | XGB                  |           |
|---------------------------|-----------------------|-----------|-----------------------|-----------|---------------------|-----------|-----------------------|-----------|----------------------|-----------|----------------------|-----------|
|                           | no filter             | 1% filter | no filter             | 1% filter | no filter           | 1% filter | no filter             | 1% filter | no filter            | 1% filter | no filter            | 1% filter |
| <b>important features</b> |                       |           |                       |           |                     |           |                       |           |                      |           |                      |           |
| <i>A</i>                  | 43                    | 31        | 359                   | 157       | 2061                | 2061      | 2336                  | 2336      | 2160                 | 1987      | 45                   | 45        |
| <i>B</i>                  | 149                   | 77        | 598                   | 198       | 2087                | 2087      | 2199                  | 13        | 2158                 | 992       | 202                  | 202       |
| <i>C</i>                  | 413                   | 169       | 421                   | 170       | 2101                | 2101      | 2079                  | 35        | 2150                 | 323       | 956                  | 153       |
| <i>D</i>                  | 556                   | 156       | 593                   | 171       | 2043                | 2043      | 2120                  | 91        | 1790                 | 335       | 2317                 | 1055      |
| <i>E</i>                  | 284                   | 198       | 740                   | 379       | 2113                | 2113      | 2117                  | 181       | 2098                 | 2098      | 1886                 | 473       |
| <i>F</i>                  | 133                   | 125       | 1351                  | 1213      | 2164                | 2164      | 2100                  | 2100      | 2095                 | 2095      | 1964                 | 1533      |
| <i>G</i>                  | 305                   | 147       | 1187                  | 371       | 2060                | 2060      | 2112                  | 38        | 2246                 | 837       | 1826                 | 1272      |
| <i>H</i>                  | 253                   | 88        | 256                   | 90        | 2094                | 2094      | 2115                  | 17        | 2099                 | 768       | 863                  | 572       |
| <i>I</i>                  | 315                   | 190       | 299                   | 179       | 2108                | 2108      | 2193                  | 94        | 2020                 | 2008      | 1419                 | 353       |
| <i>J</i>                  | 462                   | 417       | 1723                  | 1551      | 2076                | 2076      | 2054                  | 2054      | 1946                 | 1946      | 2435                 | 2042      |
| <i>K</i>                  | 490                   | 452       | 1991                  | 1916      | 2075                | 2075      | 2045                  | 2045      | 1676                 | 1676      | 1945                 | 457       |
| <i>L</i>                  | 382                   | 355       | 2056                  | 2056      | 2056                | 2056      | 2094                  | 2094      | 1775                 | 1775      | 2626                 | 1368      |
| <b>background SNPs</b>    |                       |           |                       |           |                     |           |                       |           |                      |           |                      |           |
| <i>A</i>                  | 3 (7%)                | 2 (6%)    | 40 (11%)              | 17 (11%)  | 233 (11%)           | 233 (11%) | 263 (11%)             | 263 (11%) | 239 (11%)            | 219 (11%) | 4 (9%)               | 4 (9%)    |
| <i>B</i>                  | 23 (15%)              | 17 (22%)  | 80 (13%)              | 34 (17%)  | 212 (10%)           | 212 (10%) | 229 (10%)             | 5 (38%)   | 231 (11%)            | 104 (10%) | 34 (17%)             | 34 (17%)  |
| <i>C</i>                  | 95 (23%)              | 57 (34%)  | 97 (23%)              | 58 (34%)  | 228 (11%)           | 228 (11%) | 273 (13%)             | 22 (63%)  | 256 (12%)            | 59 (18%)  | 134 (14%)            | 23 (15%)  |
| <i>D</i>                  | 105 (19%)             | 51 (33%)  | 110 (19%)             | 56 (33%)  | 252 (12%)           | 252 (12%) | 288 (14%)             | 48 (53%)  | 237 (13%)            | 55 (16%)  | 326 (14%)            | 185 (18%) |
| <i>E</i>                  | 59 (21%)              | 47 (24%)  | 119 (16%)             | 79 (21%)  | 242 (11%)           | 242 (11%) | 244 (12%)             | 47 (26%)  | 228 (11%)            | 228 (11%) | 219 (12%)            | 61 (13%)  |
| <i>F</i>                  | 22 (17%)              | 21 (17%)  | 158 (12%)             | 145 (12%) | 261 (12%)           | 261 (12%) | 227 (11%)             | 227 (11%) | 247 (12%)            | 247 (12%) | 220 (11%)            | 179 (12%) |
| <i>G</i>                  | 60 (20%)              | 42 (29%)  | 155 (13%)             | 58 (16%)  | 256 (12%)           | 256 (12%) | 256 (12%)             | 19 (50%)  | 262 (12%)            | 99 (12%)  | 236 (13%)            | 179 (14%) |
| <i>H</i>                  | 46 (18%)              | 25 (28%)  | 46 (18%)              | 24 (27%)  | 221 (11%)           | 221 (11%) | 259 (12%)             | 9 (53%)   | 255 (12%)            | 106 (14%) | 136 (16%)            | 84 (15%)  |
| <i>I</i>                  | 52 (17%)              | 35 (18%)  | 52 (17%)              | 37 (21%)  | 248 (12%)           | 248 (12%) | 262 (12%)             | 29 (31%)  | 207 (10%)            | 207 (10%) | 174 (12%)            | 54 (15%)  |
| <i>J</i>                  | 74 (16%)              | 70 (17%)  | 194 (11%)             | 183 (12%) | 246 (12%)           | 246 (12%) | 245 (12%)             | 245 (12%) | 243 (12%)            | 243 (12%) | 250 (10%)            | 208 (10%) |
| <i>K</i>                  | 72 (15%)              | 68 (15%)  | 221 (11%)             | 219 (11%) | 242 (12%)           | 242 (12%) | 220 (11%)             | 220 (11%) | 173 (10%)            | 173 (10%) | 235 (12%)            | 69 (15%)  |
| <i>L</i>                  | 59 (15%)              | 56 (16%)  | 234 (11%)             | 234 (11%) | 259 (13%)           | 259 (13%) | 237 (11%)             | 237 (11%) | 206 (12%)            | 206 (12%) | 296 (11%)            | 157 (11%) |
| <b>causal SNPs</b>        |                       |           |                       |           |                     |           |                       |           |                      |           |                      |           |
| <i>A</i>                  | 1/1 [1]               |           | 1/1 [1]               |           | 0/1 [-]             |           | 1/1 [1]               |           | 1/1 [1]              |           | 1/1 [1]              |           |
| <i>B</i>                  | 1/1 [1]               |           | 1/1 [1]               |           | 0/1 [-]             |           | 1/1 [1]               |           | 1/1 [1]              |           | 1/1 [2]              |           |
| <i>C</i>                  | 1/1 [1]               |           | 1/1 [1]               |           | 0/1 [-]             |           | 1/1 [1]               |           | 1/1 [1]              |           | 1/1 [1]              |           |
| <i>D</i>                  | 1/1 [1]               |           | 1/1 [1]               |           | 0/1 [-]             |           | 1/1 [1]               |           | 1/1 [1]              |           | 1/1 [1]              |           |
| <i>E</i>                  | 2/2 [1,2]             |           | 2/2 [1,2]             |           | 0/2 [-]             |           | 2/2 [1,2]             |           | 2/2 [1,3]            |           | 2/2 [5,8]            |           |
| <i>F</i>                  | 2/2 [2,8]             |           | 2/2 [4,44]            |           | 0/2 [-]             |           | 2/2 [1,4]             |           | 2/2 [47,48]          |           | 2/2 [22,82]          |           |
| <i>G</i>                  | 1/1 [1]               |           | 1/1 [1]               |           | 0/1 [-]             |           | 1/1 [1]               |           | 1/1 [1]              |           | 1/1 [1]              |           |
| <i>H</i>                  | 1/1 [1]               |           | 1/1 [1]               |           | 0/1 [-]             |           | 1/1 [1]               |           | 1/1 [1]              |           | 1/1 [2]              |           |
| <i>I</i>                  | 5/5 [1,2,3,4,5]       |           | 5/5 [1,2,3,4,5]       |           | 0/5 [-]             |           | 5/5 [1,2,3,4,5]       |           | 5/5 [2,18,20,67,145] |           | 5/5 [13,23,29,32,86] |           |
| <i>J</i>                  | 17/20 [12 in top20]   |           | 19/20 [7 in top20]    |           | 0/20 [0 in top20]   |           | 19/20 [11 in top20]   |           | 18/20 [2 in top20]   |           | 15/20 [0 in top20]   |           |
| <i>K</i>                  | 24/50 [10 in top50]   |           | 38/50 [11 in top50]   |           | 0/50 [0 in top50]   |           | 41/50 [11 in top50]   |           | 20/50 [1 in top50]   |           | 25/50 [1 in top50]   |           |
| <i>L</i>                  | 24/100 [10 in top100] |           | 61/100 [14 in top100] |           | 0/100 [0 in top100] |           | 59/100 [15 in top100] |           | 35/100 [3 in top100] |           | 28/100 [2 in top100] |           |

**Table S8. Analysis of feature importances of LASSO, ElasticNet, RR-BLUP, Bayes B, RF and XGB for synthetic data with  $h = 0.95$ :** For each simulation configuration and model, the table shows the number of SNPs deemed as important feature for at least one of the outer folds in the nested cross-validation, both, without and with filtering those which are smaller than one percent of the largest feature importance. Furthermore, the number of background SNPs within the important features are stated as well as the ratio between the found background SNPs and the total amount of important features as percentage value in parentheses, again without and with filtering. For the causal SNPs, we show the number of causal SNPs deemed important by each algorithm and in brackets the ranking of the causal SNPs within the important features. For configurations *J*, *K* and *L*, we give the number of causal SNPs within the *k* (total number of causal SNPs) most important features.

Where *A*: #100, *B*: #500, *C*: #1000, *D*: #2000, *E*: MultWeak, *F*: MultStrong, *G*: SkewedWeak, *H*: SkewedStrong, *I*: Add5, *J*: Add20, *K*: Add50, *L*: Add100

| Sim                       | LASSO                 |           | ElasticNet            |           | RR-BLUP             |           | Bayes B               |           | RF                   |           | XGB                     |           |
|---------------------------|-----------------------|-----------|-----------------------|-----------|---------------------|-----------|-----------------------|-----------|----------------------|-----------|-------------------------|-----------|
|                           | no filter             | 1% filter | no filter             | 1% filter | no filter           | 1% filter | no filter             | 1% filter | no filter            | 1% filter | no filter               | 1% filter |
| <b>important features</b> |                       |           |                       |           |                     |           |                       |           |                      |           |                         |           |
| <i>A</i>                  | 42                    | 40        | 733                   | 582       | 2075                | 2075      | 2327                  | 2327      | 2354                 | 2213      | 87                      | 87        |
| <i>B</i>                  | 299                   | 187       | 1466                  | 674       | 2090                | 2090      | 2124                  | 21        | 1924                 | 1121      | 890                     | 66        |
| <i>C</i>                  | 531                   | 142       | 541                   | 148       | 2085                | 2085      | 2134                  | 26        | 2428                 | 772       | 1749                    | 459       |
| <i>D</i>                  | 888                   | 293       | 1004                  | 374       | 2039                | 2039      | 2112                  | 167       | 2001                 | 510       | 2479                    | 60        |
| <i>E</i>                  | 333                   | 225       | 1639                  | 1137      | 2091                | 2091      | 2080                  | 286       | 1921                 | 1921      | 1928                    | 792       |
| <i>F</i>                  | 299                   | 238       | 1595                  | 1131      | 2082                | 2082      | 2094                  | 562       | 1654                 | 1654      | 1897                    | 1047      |
| <i>G</i>                  | 404                   | 157       | 441                   | 186       | 2076                | 2076      | 2072                  | 33        | 2169                 | 839       | 2528                    | 1202      |
| <i>H</i>                  | 384                   | 135       | 387                   | 135       | 2068                | 2068      | 2028                  | 25        | 2006                 | 548       | 1993                    | 1118      |
| <i>I</i>                  | 549                   | 425       | 1775                  | 1533      | 2060                | 2060      | 2105                  | 838       | 1993                 | 1993      | 2590                    | 2590      |
| <i>J</i>                  | 619                   | 490       | 1181                  | 839       | 2079                | 2079      | 2217                  | 569       | 1812                 | 1592      | 1593                    | 254       |
| <i>K</i>                  | 748                   | 661       | 2122                  | 2122      | 2023                | 2023      | 2081                  | 2081      | 2089                 | 2089      | 1991                    | 1492      |
| <i>L</i>                  | 516                   | 464       | 2000                  | 2000      | 2096                | 2096      | 2091                  | 2091      | 1745                 | 1745      | 1824                    | 1017      |
| <b>background SNPs</b>    |                       |           |                       |           |                     |           |                       |           |                      |           |                         |           |
| <i>A</i>                  | 3 (7%)                | 3 (7%)    | 90 (12%)              | 75 (13%)  | 228 (11%)           | 228 (11%) | 265 (11%)             | 265 (11%) | 258 (11%)            | 241 (11%) | 11 (13%)                | 11 (13%)  |
| <i>B</i>                  | 43 (14%)              | 31 (17%)  | 152 (10%)             | 84 (12%)  | 225 (11%)           | 225 (11%) | 243 (11%)             | 9 (43%)   | 222 (12%)            | 141 (13%) | 105 (12%)               | 10 (15%)  |
| <i>C</i>                  | 94 (18%)              | 41 (29%)  | 94 (17%)              | 42 (28%)  | 237 (11%)           | 237 (11%) | 274 (13%)             | 15 (58%)  | 272 (11%)            | 120 (16%) | 232 (13%)               | 75 (16%)  |
| <i>D</i>                  | 179 (20%)             | 100 (34%) | 186 (19%)             | 125 (33%) | 249 (12%)           | 249 (12%) | 322 (15%)             | 89 (53%)  | 243 (12%)            | 75 (15%)  | 357 (14%)               | 15 (25%)  |
| <i>E</i>                  | 58 (17%)              | 48 (21%)  | 220 (13%)             | 174 (15%) | 241 (12%)           | 241 (12%) | 260 (12%)             | 66 (23%)  | 223 (12%)            | 223 (12%) | 236 (12%)               | 114 (14%) |
| <i>F</i>                  | 60 (20%)              | 51 (21%)  | 192 (12%)             | 151 (13%) | 254 (12%)           | 254 (12%) | 260 (12%)             | 121 (22%) | 216 (13%)            | 216 (13%) | 221 (12%)               | 127 (12%) |
| <i>G</i>                  | 76 (19%)              | 44 (28%)  | 82 (19%)              | 49 (26%)  | 237 (11%)           | 237 (11%) | 258 (12%)             | 19 (58%)  | 240 (11%)            | 107 (13%) | 316 (12%)               | 170 (14%) |
| <i>H</i>                  | 65 (17%)              | 33 (24%)  | 64 (17%)              | 33 (24%)  | 256 (12%)           | 256 (12%) | 217 (11%)             | 13 (52%)  | 240 (12%)            | 74 (14%)  | 259 (13%)               | 156 (14%) |
| <i>I</i>                  | 101 (18%)             | 86 (20%)  | 237 (13%)             | 212 (14%) | 255 (12%)           | 255 (12%) | 268 (13%)             | 155 (18%) | 267 (13%)            | 267 (13%) | 333 (13%)               | 333 (13%) |
| <i>J</i>                  | 95 (15%)              | 78 (16%)  | 147 (12%)             | 119 (12%) | 245 (14%)           | 245 (12%) | 262 (12%)             | 94 (17%)  | 208 (11%)            | 185 (12%) | 213 (13%)               | 40 (16%)  |
| <i>K</i>                  | 102 (14%)             | 94 (14%)  | 263 (12%)             | 263 (12%) | 251 (12%)           | 251 (12%) | 253 (12%)             | 253 (12%) | 238 (11%)            | 238 (11%) | 244 (12%)               | 198 (13%) |
| <i>L</i>                  | 74 (14%)              | 66 (14%)  | 244 (12%)             | 244 (12%) | 252 (12%)           | 252 (12%) | 260 (12%)             | 260 (12%) | 209 (12%)            | 209 (12%) | 231 (13%)               | 145 (14%) |
| <b>causal SNPs</b>        |                       |           |                       |           |                     |           |                       |           |                      |           |                         |           |
| <i>A</i>                  | 1/1 [2]               |           | 1/1 [2]               |           | 0/1 [-]             |           | 1/1 [1]               |           | 1/1 [1]              |           | 1/1 [49]                |           |
| <i>B</i>                  | 1/1 [1]               |           | 1/1 [1]               |           | 0/1 [-]             |           | 1/1 [1]               |           | 1/1 [1]              |           | 1/1 [1]                 |           |
| <i>C</i>                  | 1/1 [1]               |           | 1/1 [1]               |           | 0/1 [-]             |           | 1/1 [1]               |           | 1/1 [1]              |           | 1/1 [3]                 |           |
| <i>D</i>                  | 1/1 [1]               |           | 1/1 [1]               |           | 0/1 [-]             |           | 1/1 [1]               |           | 1/1 [3]              |           | 1/1 [4]                 |           |
| <i>E</i>                  | 2/2 [1,2]             |           | 2/2 [1,2]             |           | 0/2 [-]             |           | 2/2 [1,2]             |           | 2/2 [1,3]            |           | 2/2 [9,18]              |           |
| <i>F</i>                  | 2/2 [1,26]            |           | 2/2 [1,134]           |           | 0/2 [-]             |           | 2/2 [1,57]            |           | 2/2 [65,273]         |           | 2/2 [30,250]            |           |
| <i>G</i>                  | 1/1 [1]               |           | 1/1 [1]               |           | 0/1 [-]             |           | 1/1 [1]               |           | 1/1 [1]              |           | 1/1 [3]                 |           |
| <i>H</i>                  | 1/1 [1]               |           | 1/1 [1]               |           | 0/1 [-]             |           | 1/1 [1]               |           | 1/1 [1]              |           | 1/1 [2]                 |           |
| <i>I</i>                  | 5/5 [2,4,5,9,10]      |           | 5/5 [1,3,6,10,17]     |           | 0/5 [-]             |           | 5/5 [2,4,6,7,10]      |           | 5/5 [1,5,21,22,161]  |           | 5/5 [5,66,328,693,2195] |           |
| <i>J</i>                  | 19/20 [13 in top20]   |           | 20/20 [12 in top20]   |           | 0/20 [0 in top20]   |           | 20/20 [13 in top20]   |           | 17/20 [1 in top20]   |           | 19/20 [2 in top20]      |           |
| <i>K</i>                  | 33/50 [15 in top50]   |           | 46/50 [15 in top50]   |           | 0/50 [0 in top50]   |           | 45/50 [15 in top50]   |           | 34/50 [1 in top50]   |           | 28/50 [0 in top50]      |           |
| <i>L</i>                  | 44/100 [17 in top100] |           | 70/100 [26 in top100] |           | 2/100 [0 in top100] |           | 67/100 [27 in top100] |           | 31/100 [0 in top100] |           | 43/100 [1 in top100]    |           |



## 2 SUPPLEMENTARY FIGURES

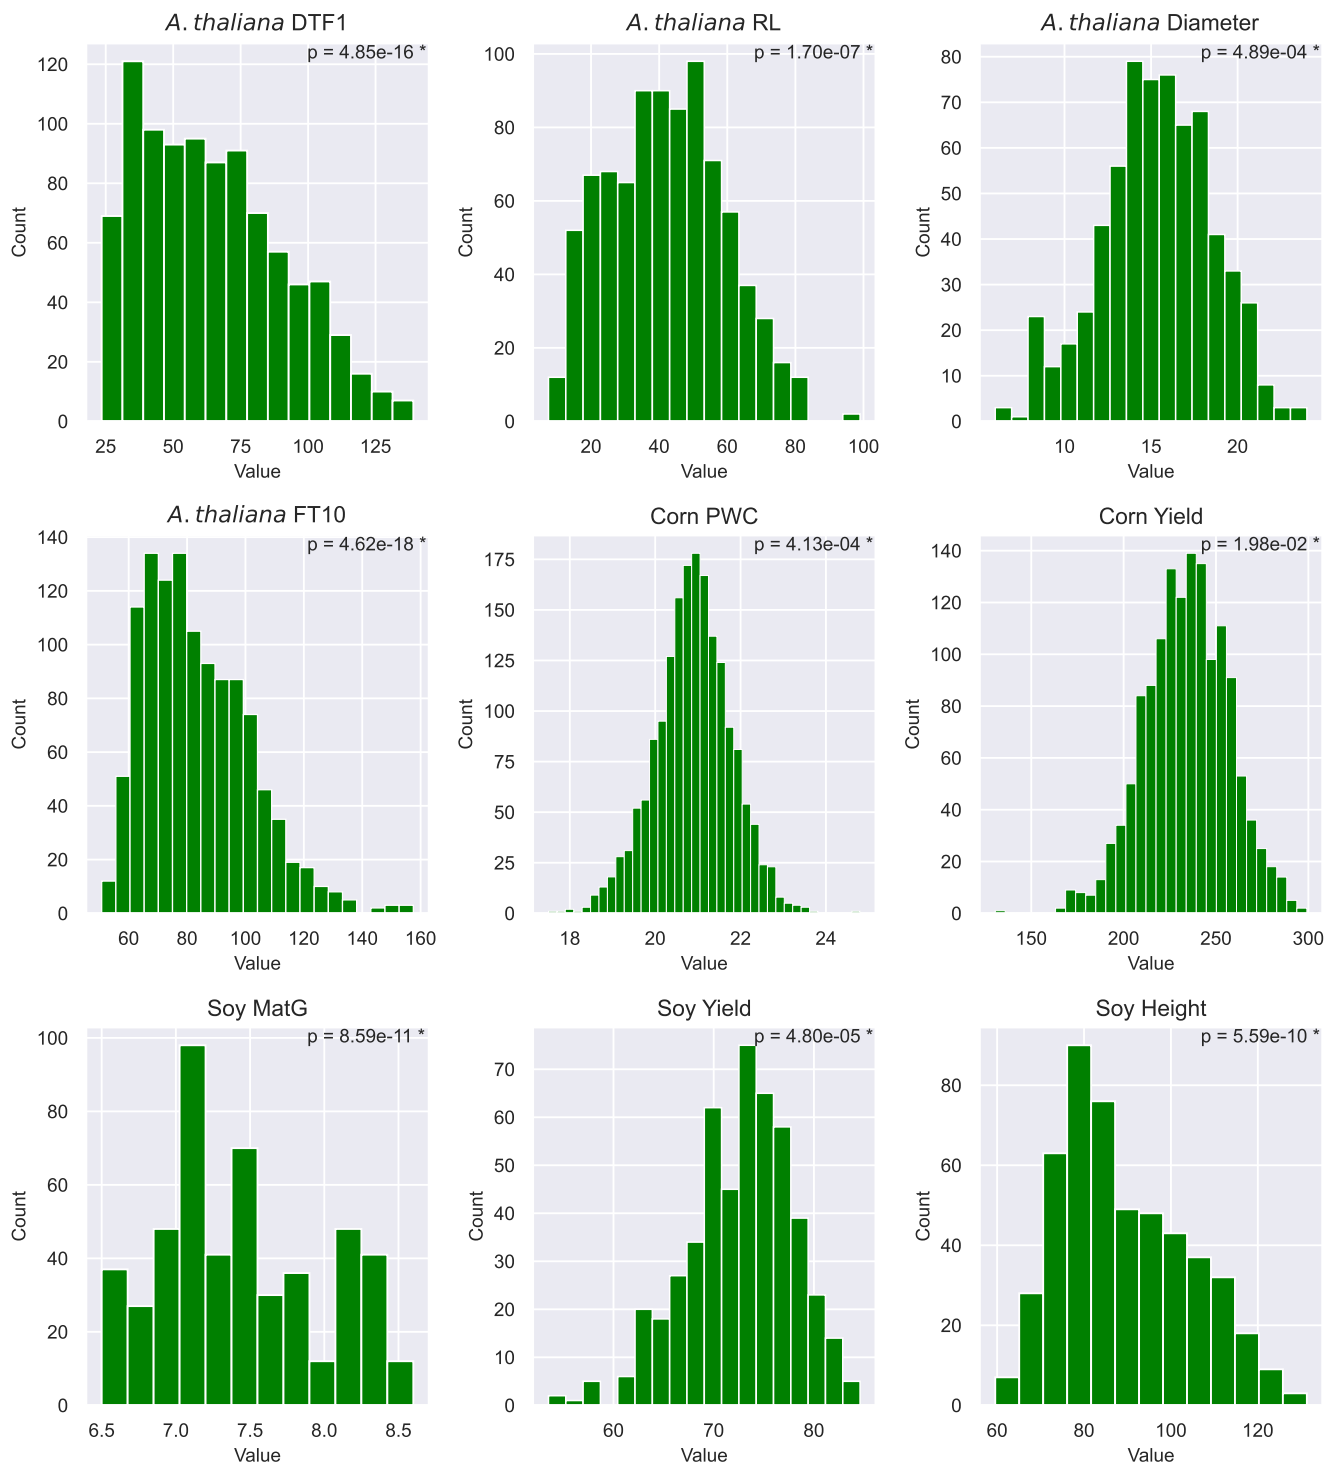

**Figure S1. Histograms showing the distributions of all real-world phenotypes:** Each subplot shows the distribution of a real-world phenotype. Additionally, for each trait the p-value of the Shapiro-Wilk test is given. Significant p-values (i.e.  $p < 0.05$ ) are marked with an asterisk.

Results overview on synthetic data with  $h = 0.7$

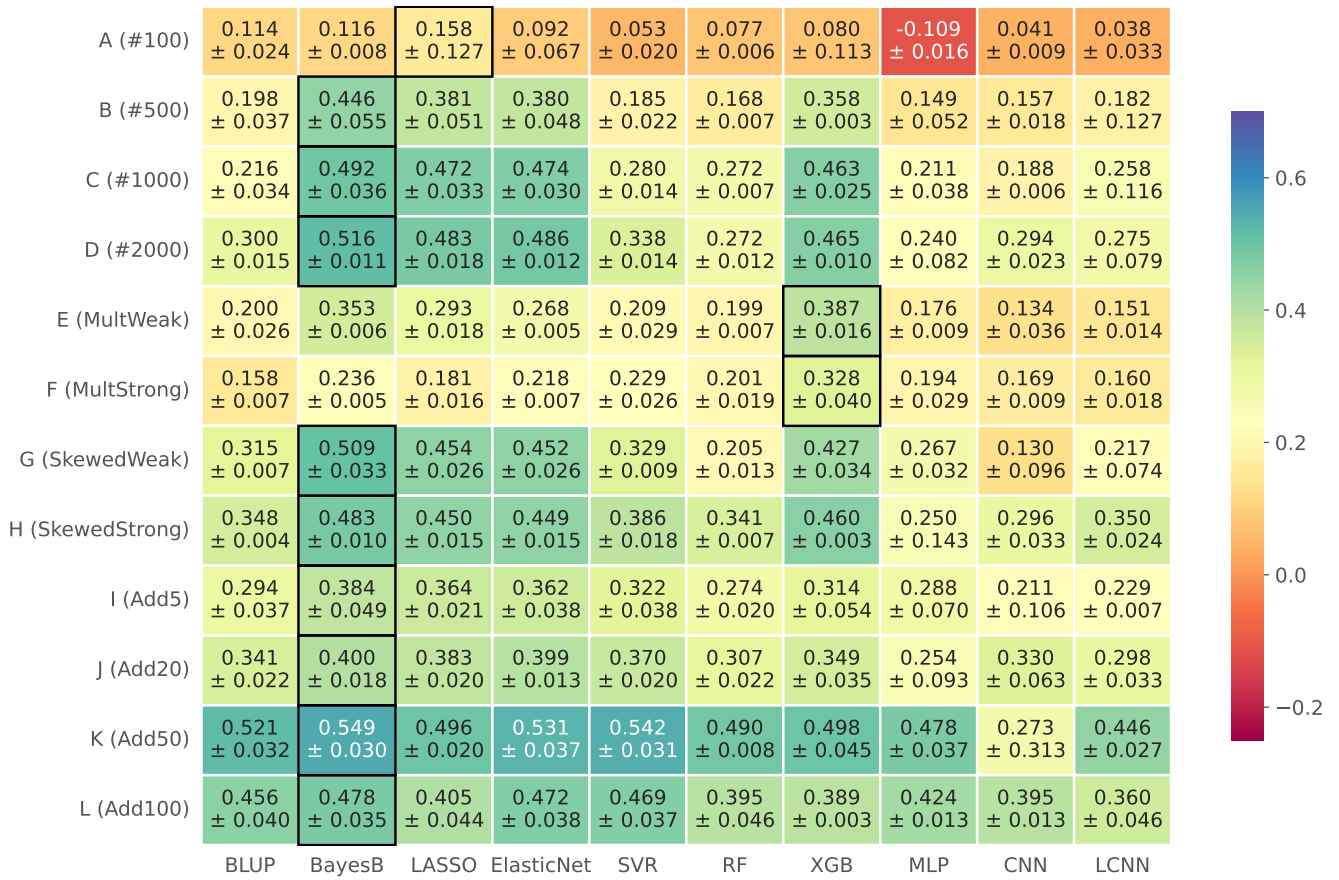

**Figure S2. Results on synthetic data with  $h = 0.7$  shown in a heatmap:** Each cell gives the explained variance  $\nu$  that the prediction model given on the horizontal axis achieved for the simulation configuration specified on the vertical axis. The color of each cell ranging from dark red to dark blue represents the prediction performance. The best result for each simulated phenotype is highlighted by a black frame around the cell.

Results overview on synthetic data with  $h = 0.85$ 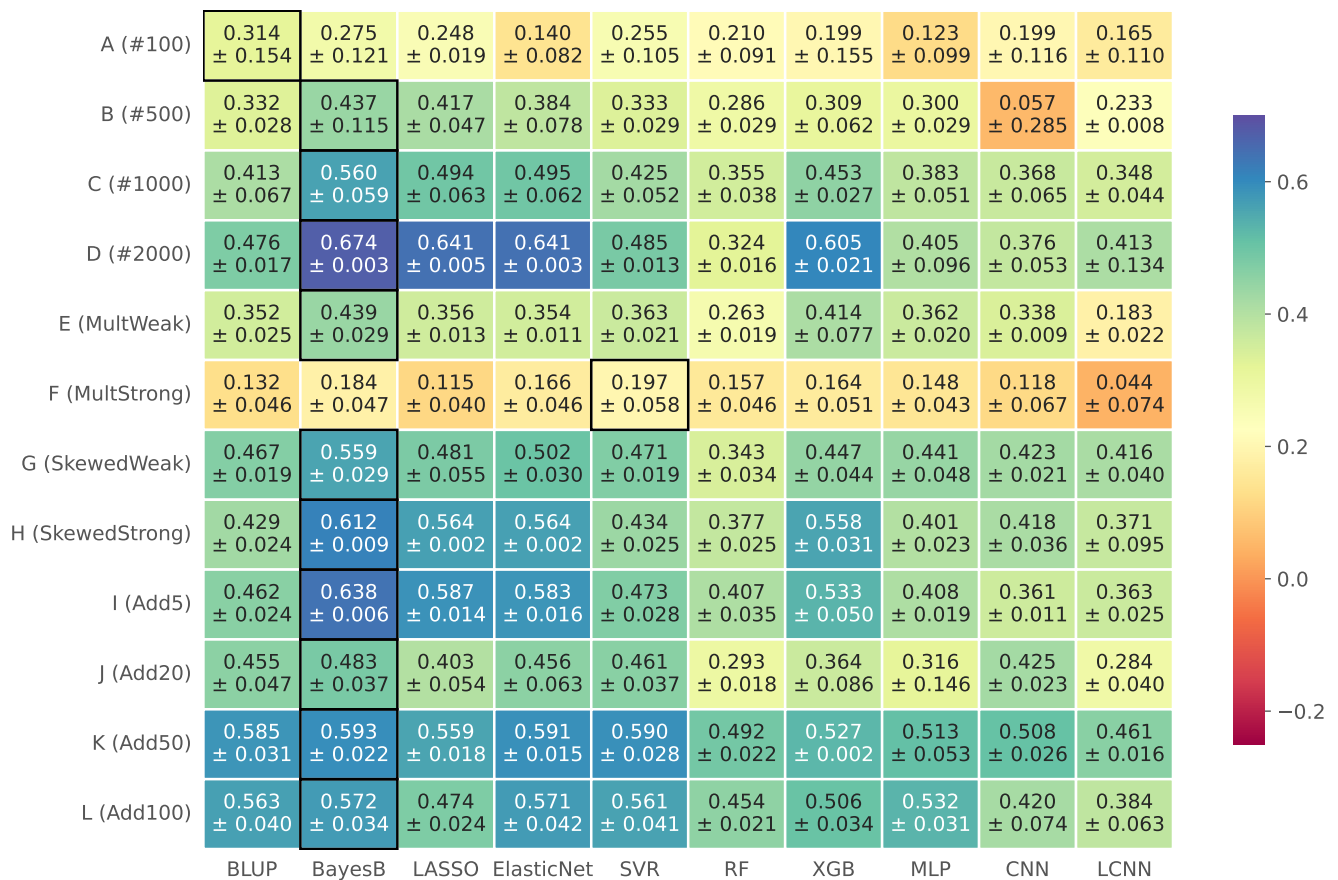

**Figure S3. Results on synthetic data with  $h = 0.85$  shown in a heatmap:** Each cell gives the explained variance  $\nu$  that the prediction model given on the horizontal axis achieved for the simulation configuration specified on the vertical axis. The color of each cell ranging from dark red to dark blue represents the prediction performance. The best result for each simulated phenotype is highlighted by a black frame around the cell.

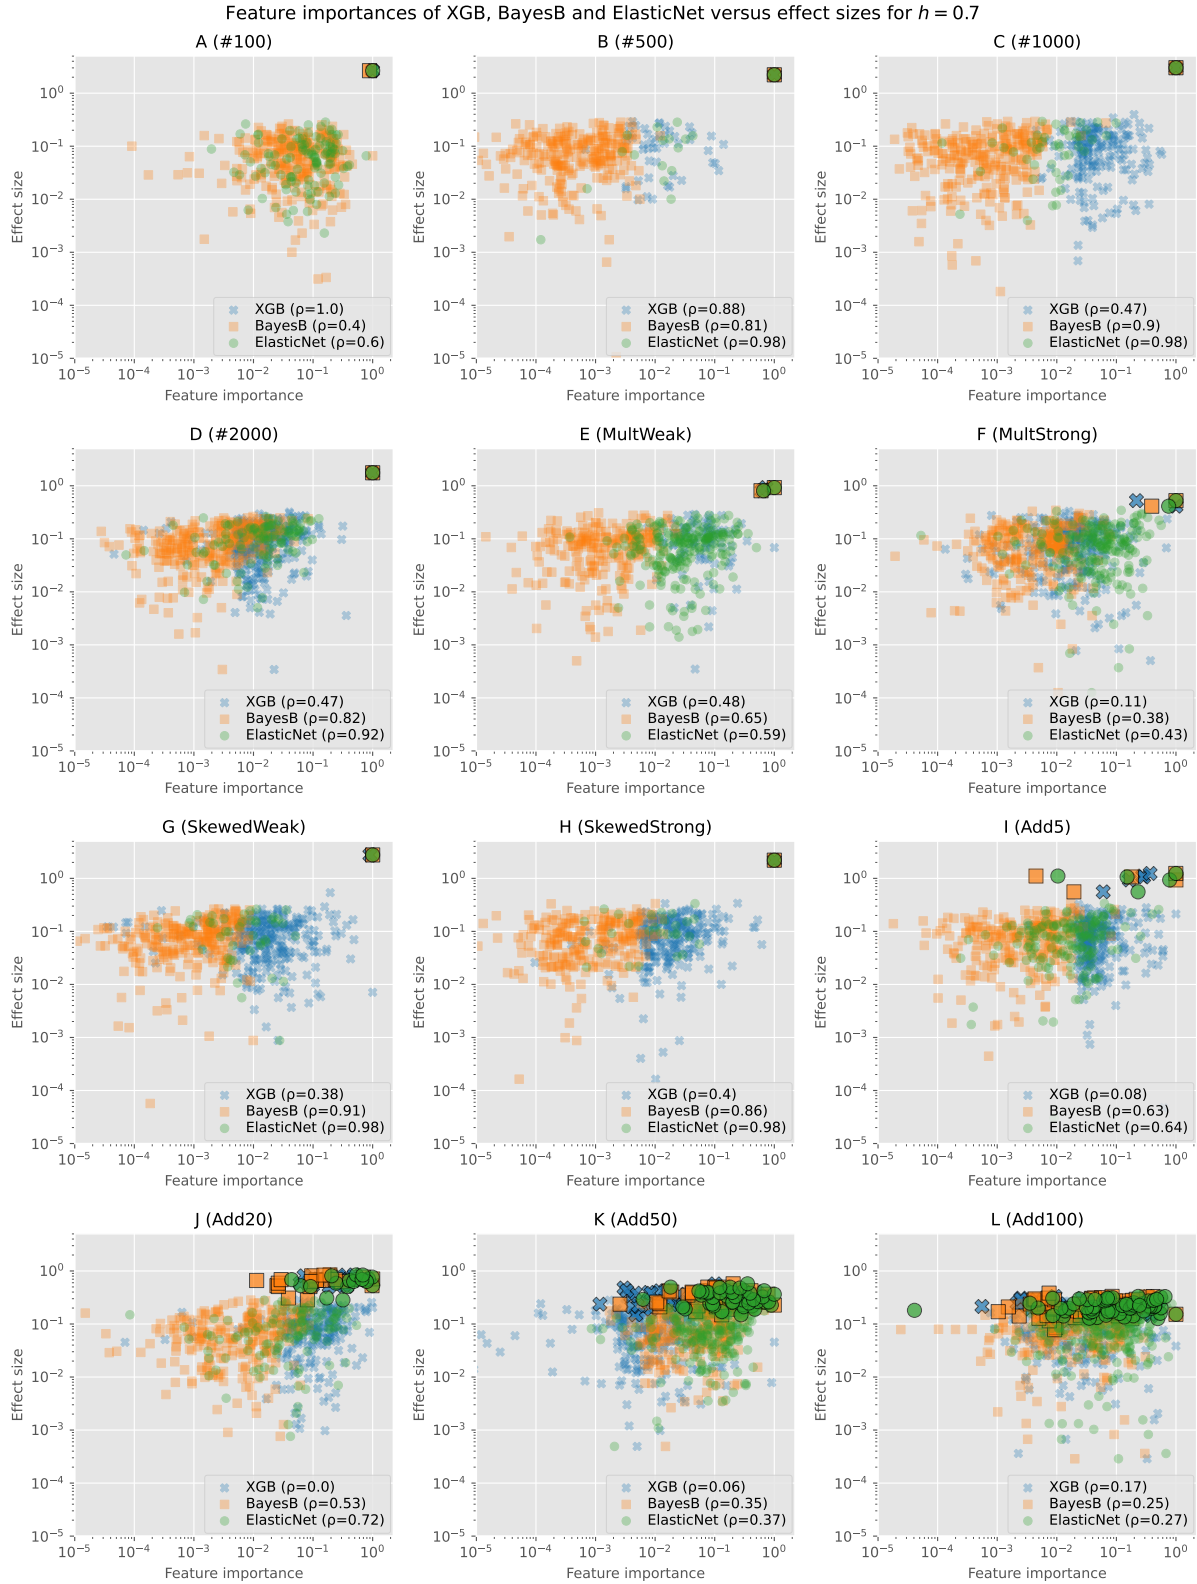

**Figure S4. Min-max normalized feature importances of BayesB, ElasticNet and XGB in comparison with effect sizes on synthetic data for  $h = 0.7$ :** Each subplot shows the results of one of the simulation configurations on a logarithmic scale. Only SNPs for which both the effect size as well as the feature importance are not zero are shown. Causal SNPs are highlighted by a larger marker size and a black frame. The legend additionally gives the Pearson correlation coefficient of the effect sizes and feature importances.

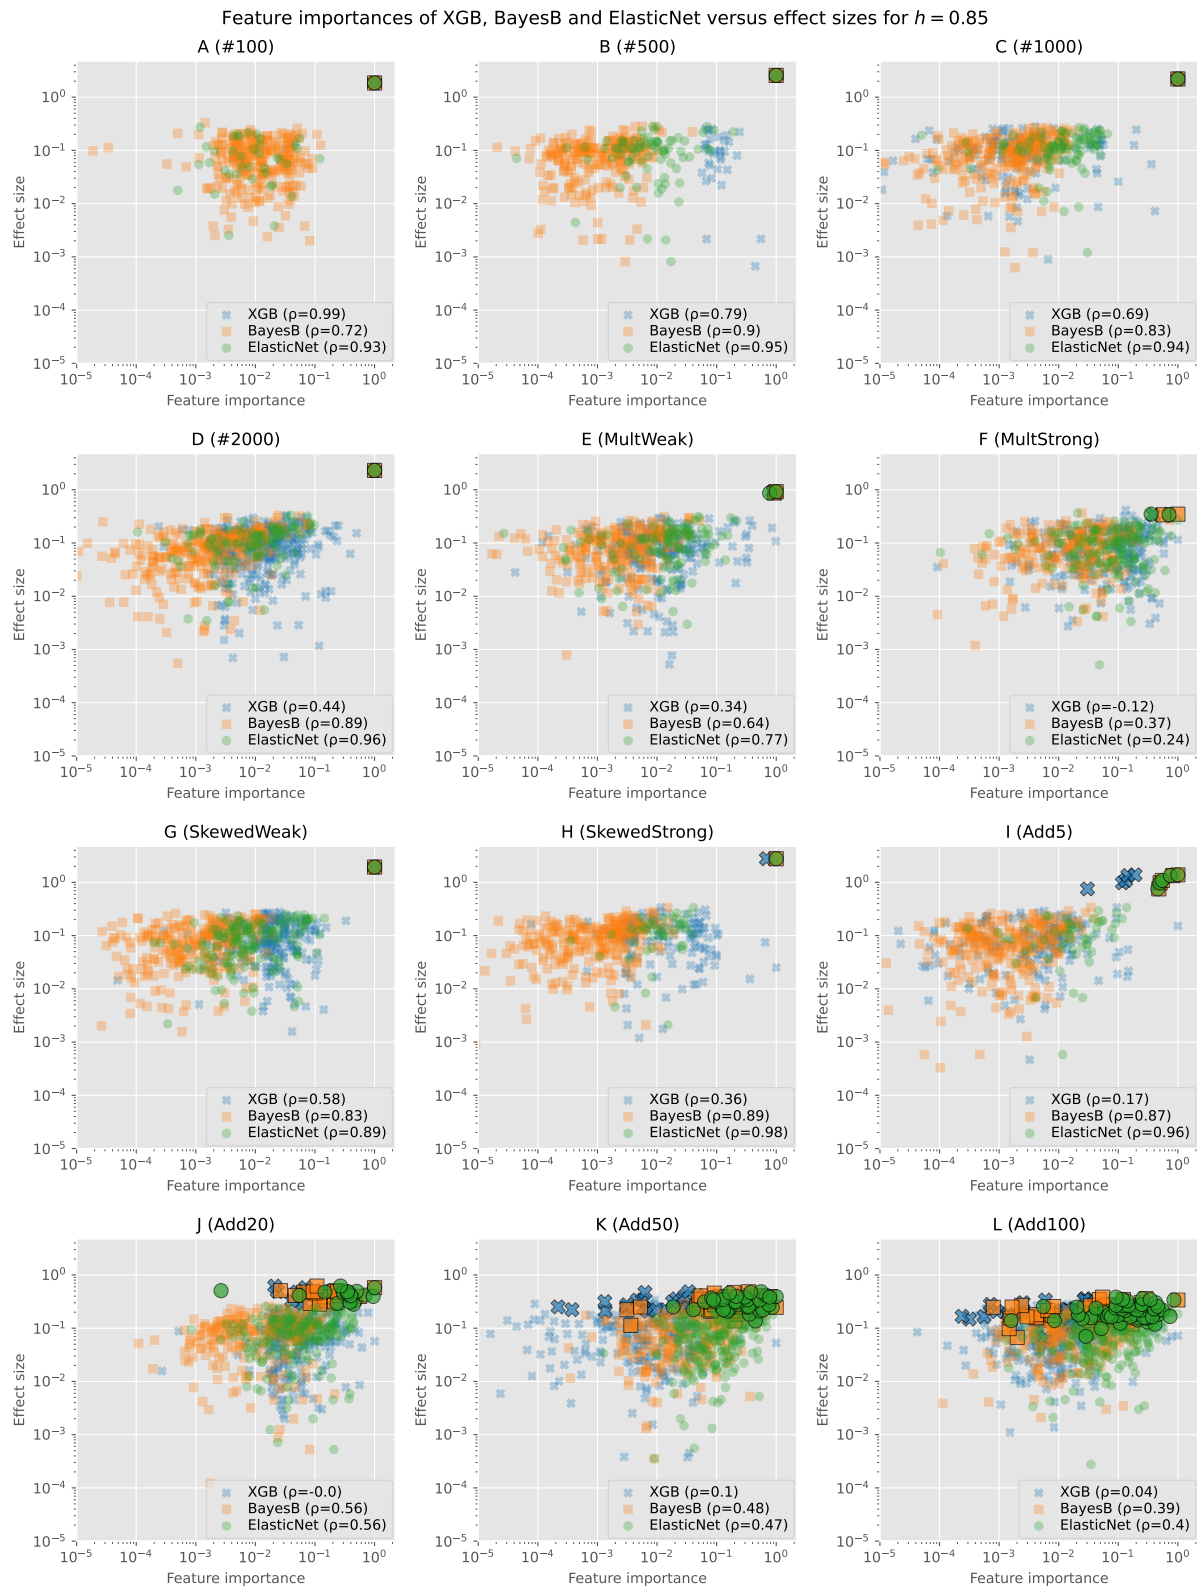

**Figure S5. Min-max normalized feature importances of BayesB, ElasticNet and XGB in comparison with effect sizes on synthetic data for  $h = 0.85$ :** Each subplot shows the results of one of the simulation configurations on a logarithmic scale. Only SNPs for which both the effect size as well as the feature importance are not zero are shown. Causal SNPs are highlighted by a larger marker size and a black frame. The legend additionally gives the Pearson correlation coefficient of the effect sizes and feature importances.

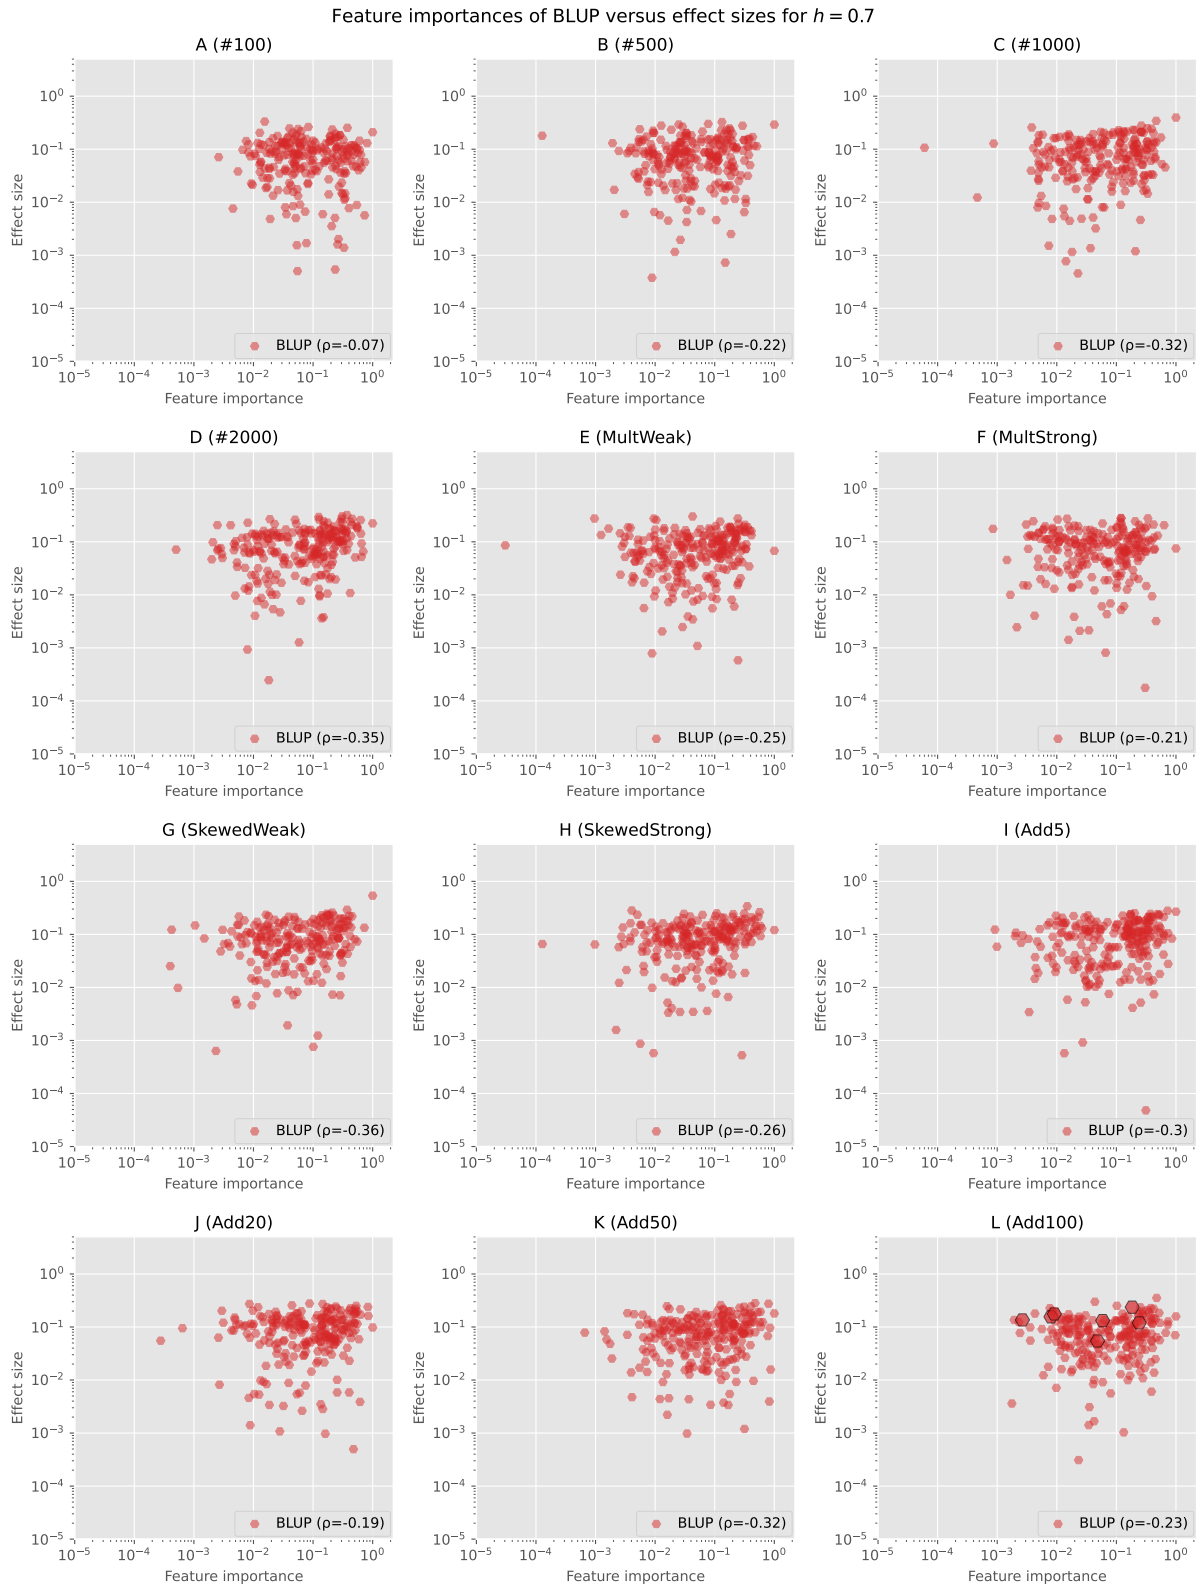

**Figure S6. Min-max normalized feature importances of RR-BLUP with effect sizes on synthetic data for  $h = 0.7$ :** Each subplot shows the results of one of the simulation configurations on a logarithmic scale. Only SNPs for which both the effect size as well as the feature importance are not zero are shown. Causal SNPs are highlighted by a larger marker size and a black frame. The legend additionally gives the Pearson correlation coefficient of the effect sizes and feature importances.

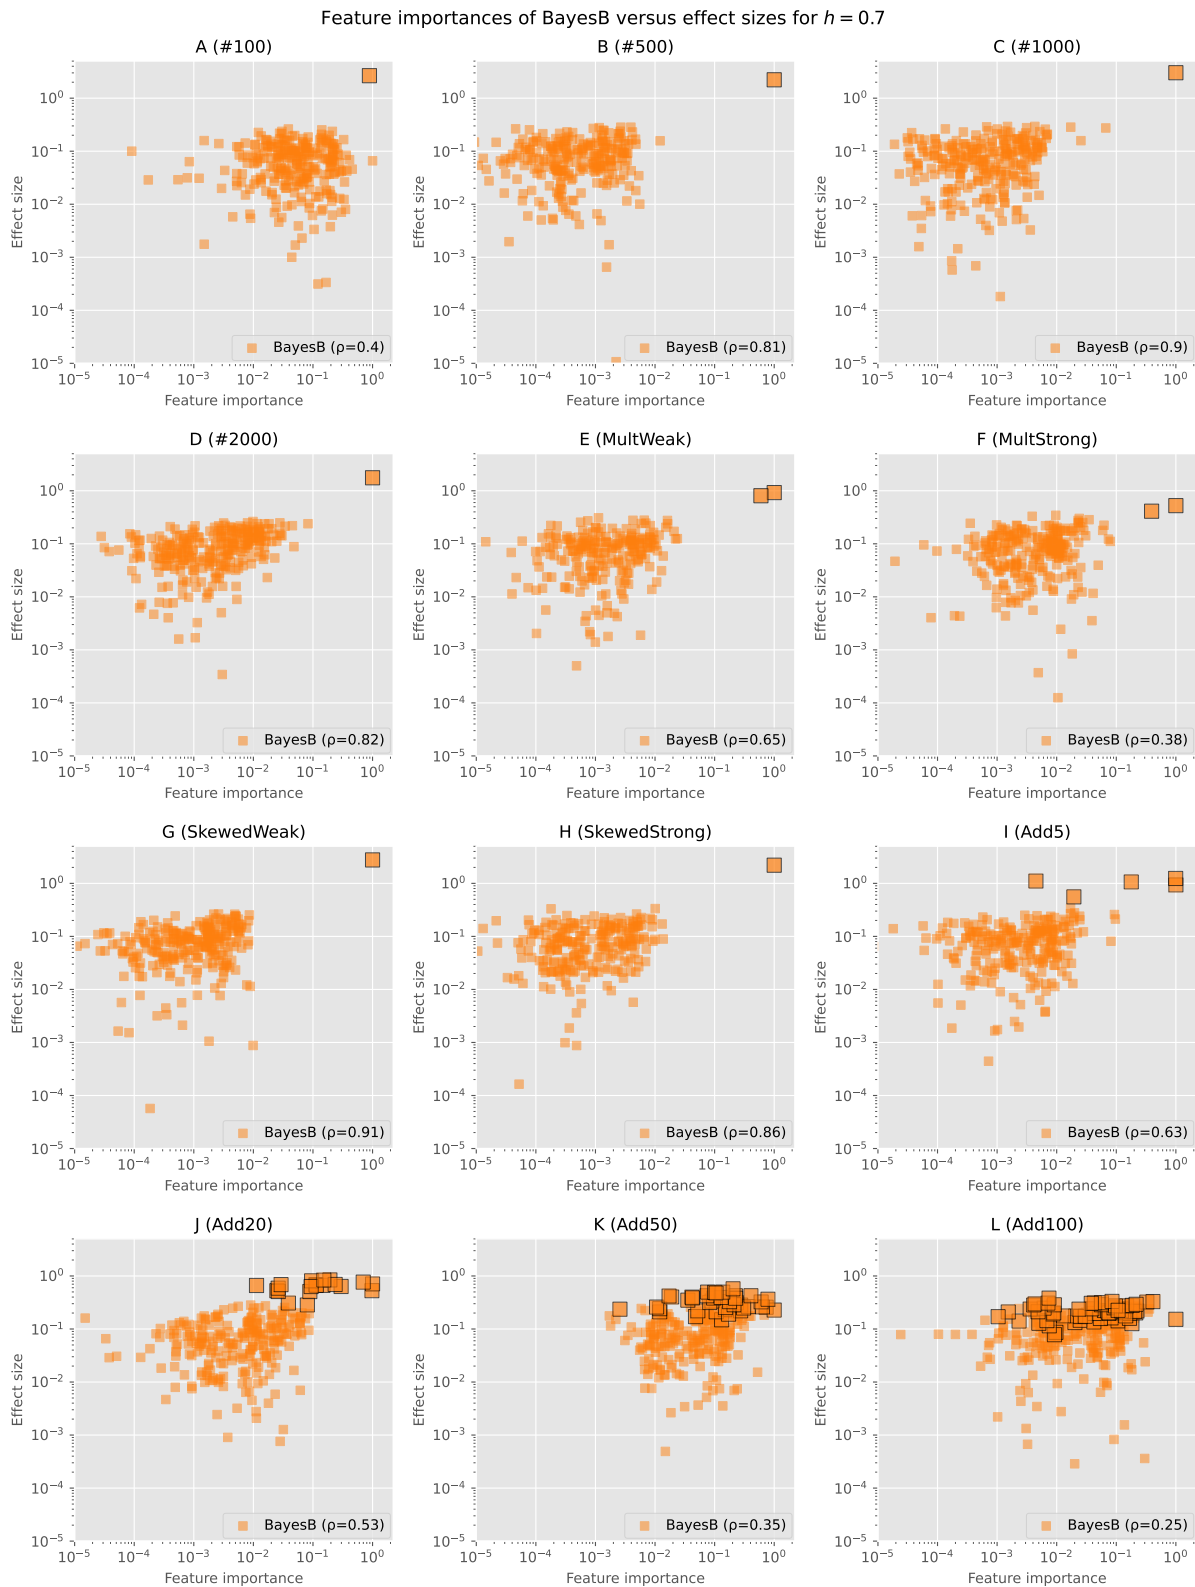

**Figure S7. Min-max normalized feature importances of BayesB with effect sizes on synthetic data for  $h = 0.7$ :** Each subplot shows the results of one of the simulation configurations on a logarithmic scale. Only SNPs for which both the effect size as well as the feature importance are not zero are shown. Causal SNPs are highlighted by a larger marker size and a black frame. The legend additionally gives the Pearson correlation coefficient of the effect sizes and feature importances.

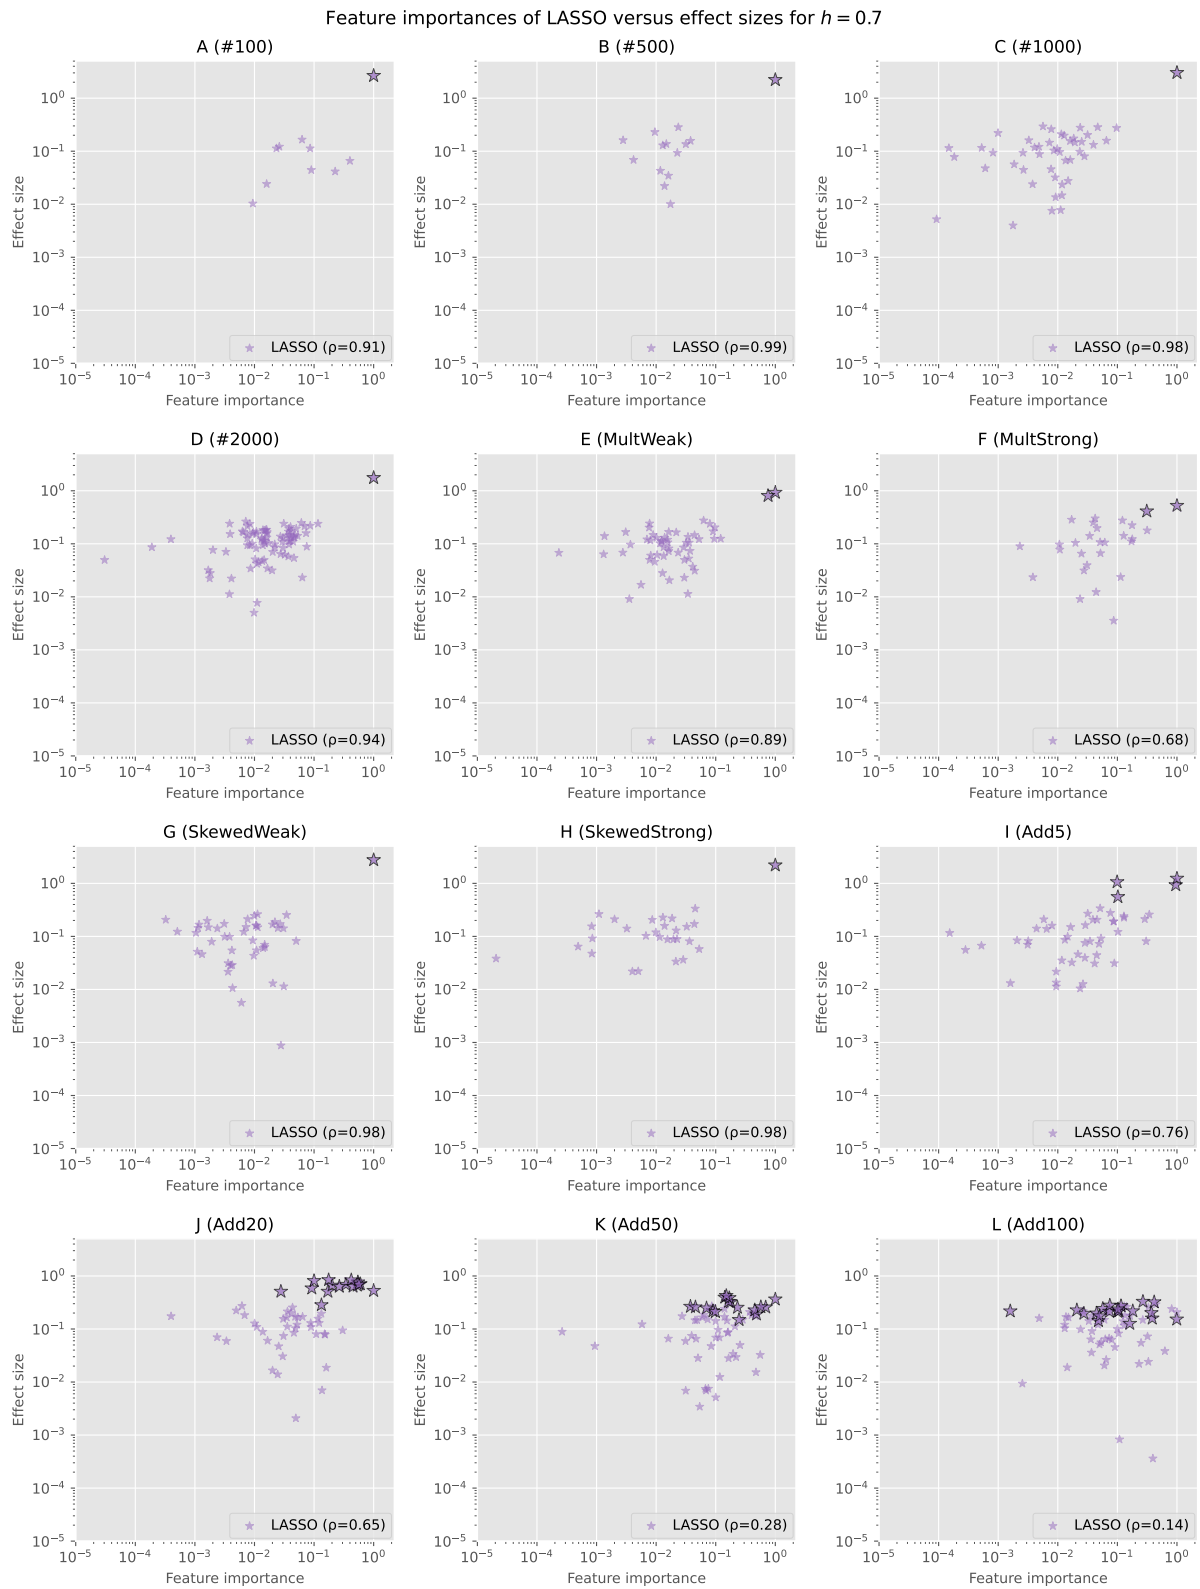

**Figure S8. Min-max normalized feature importances of LASSO with effect sizes on synthetic data for  $h = 0.7$ :** Each subplot shows the results of one of the simulation configurations on a logarithmic scale. Only SNPs for which both the effect size as well as the feature importance are not zero are shown. Causal SNPs are highlighted by a larger marker size and a black frame. The legend additionally gives the Pearson correlation coefficient of the effect sizes and feature importances.



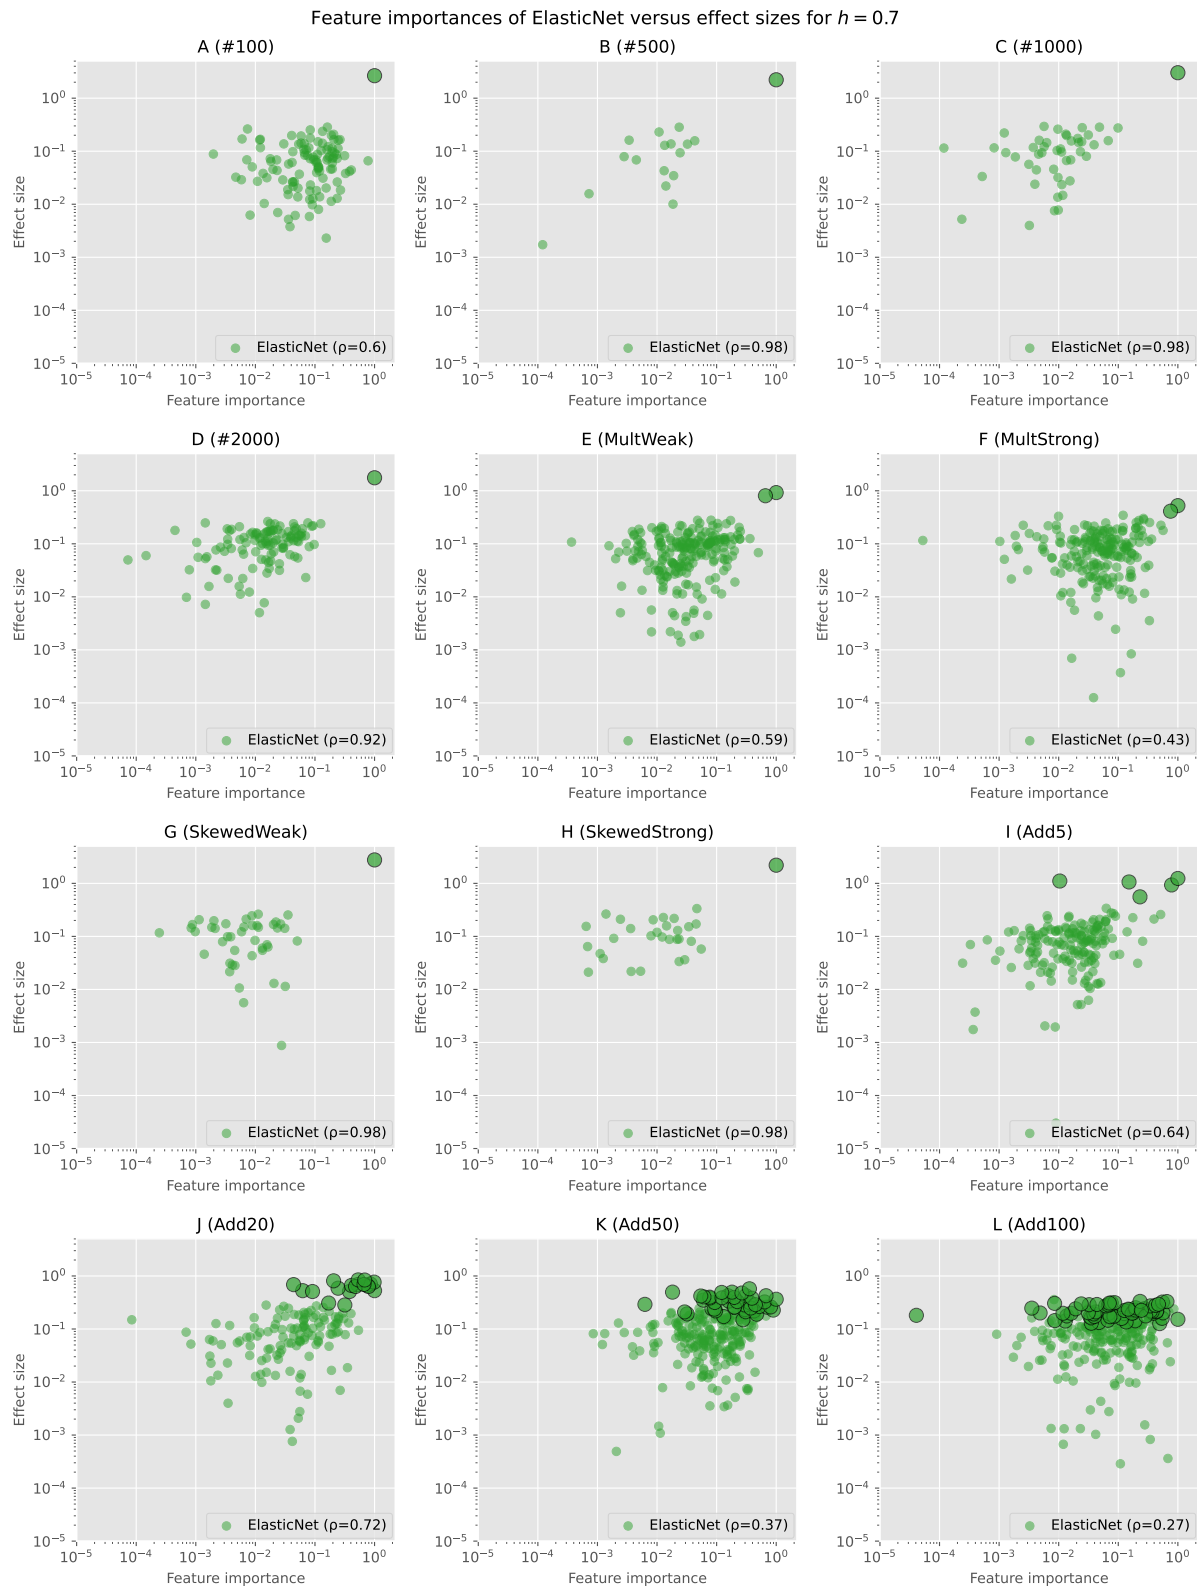

**Figure S9. Min-max normalized feature importances of ElasticNet with effect sizes on synthetic data for  $h = 0.7$ :** Each subplot shows the results of one of the simulation configurations on a logarithmic scale. Only SNPs for which both the effect size as well as the feature importance are not zero are shown. Causal SNPs are highlighted by a larger marker size and a black frame. The legend additionally gives the Pearson correlation coefficient of the effect sizes and feature importances.

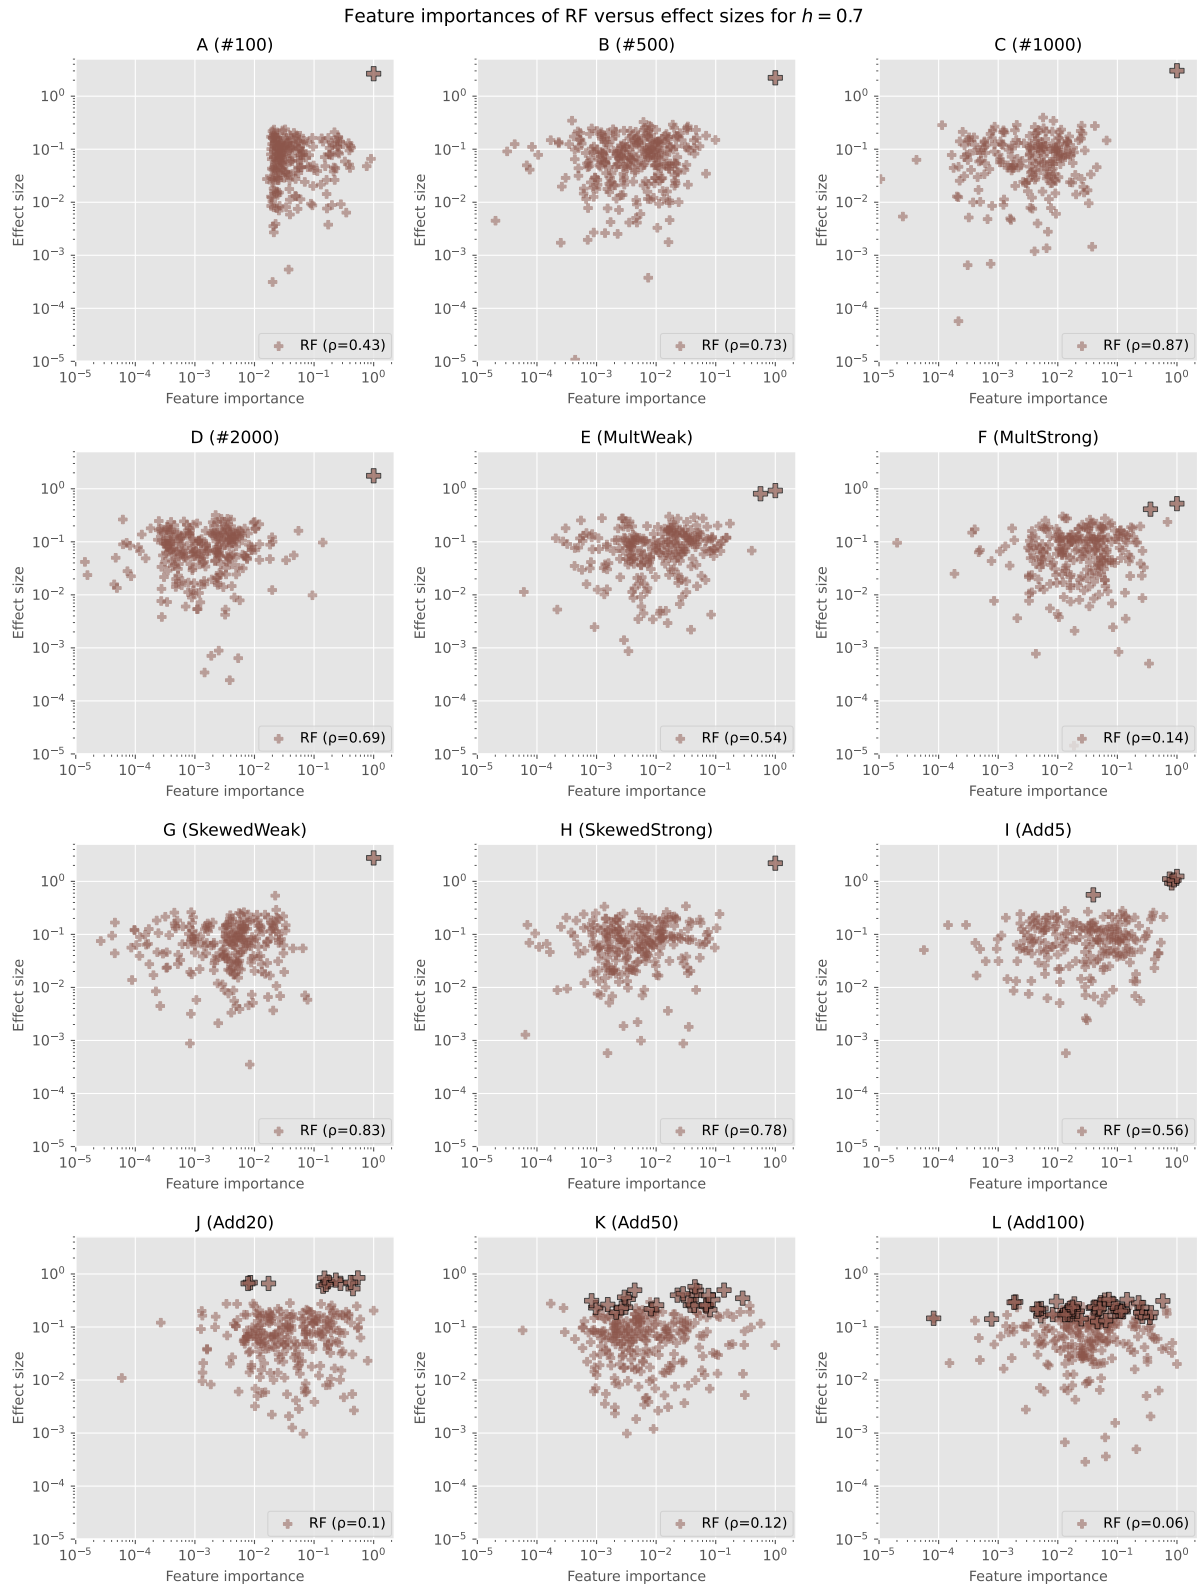

**Figure S10. Min-max normalized feature importances of RF with effect sizes on synthetic data for  $h = 0.7$ :** Each subplot shows the results of one of the simulation configurations on a logarithmic scale. Only SNPs for which both the effect size as well as the feature importance are not zero are shown. Causal SNPs are highlighted by a larger marker size and a black frame. The legend additionally gives the Pearson correlation coefficient of the effect sizes and feature importances.

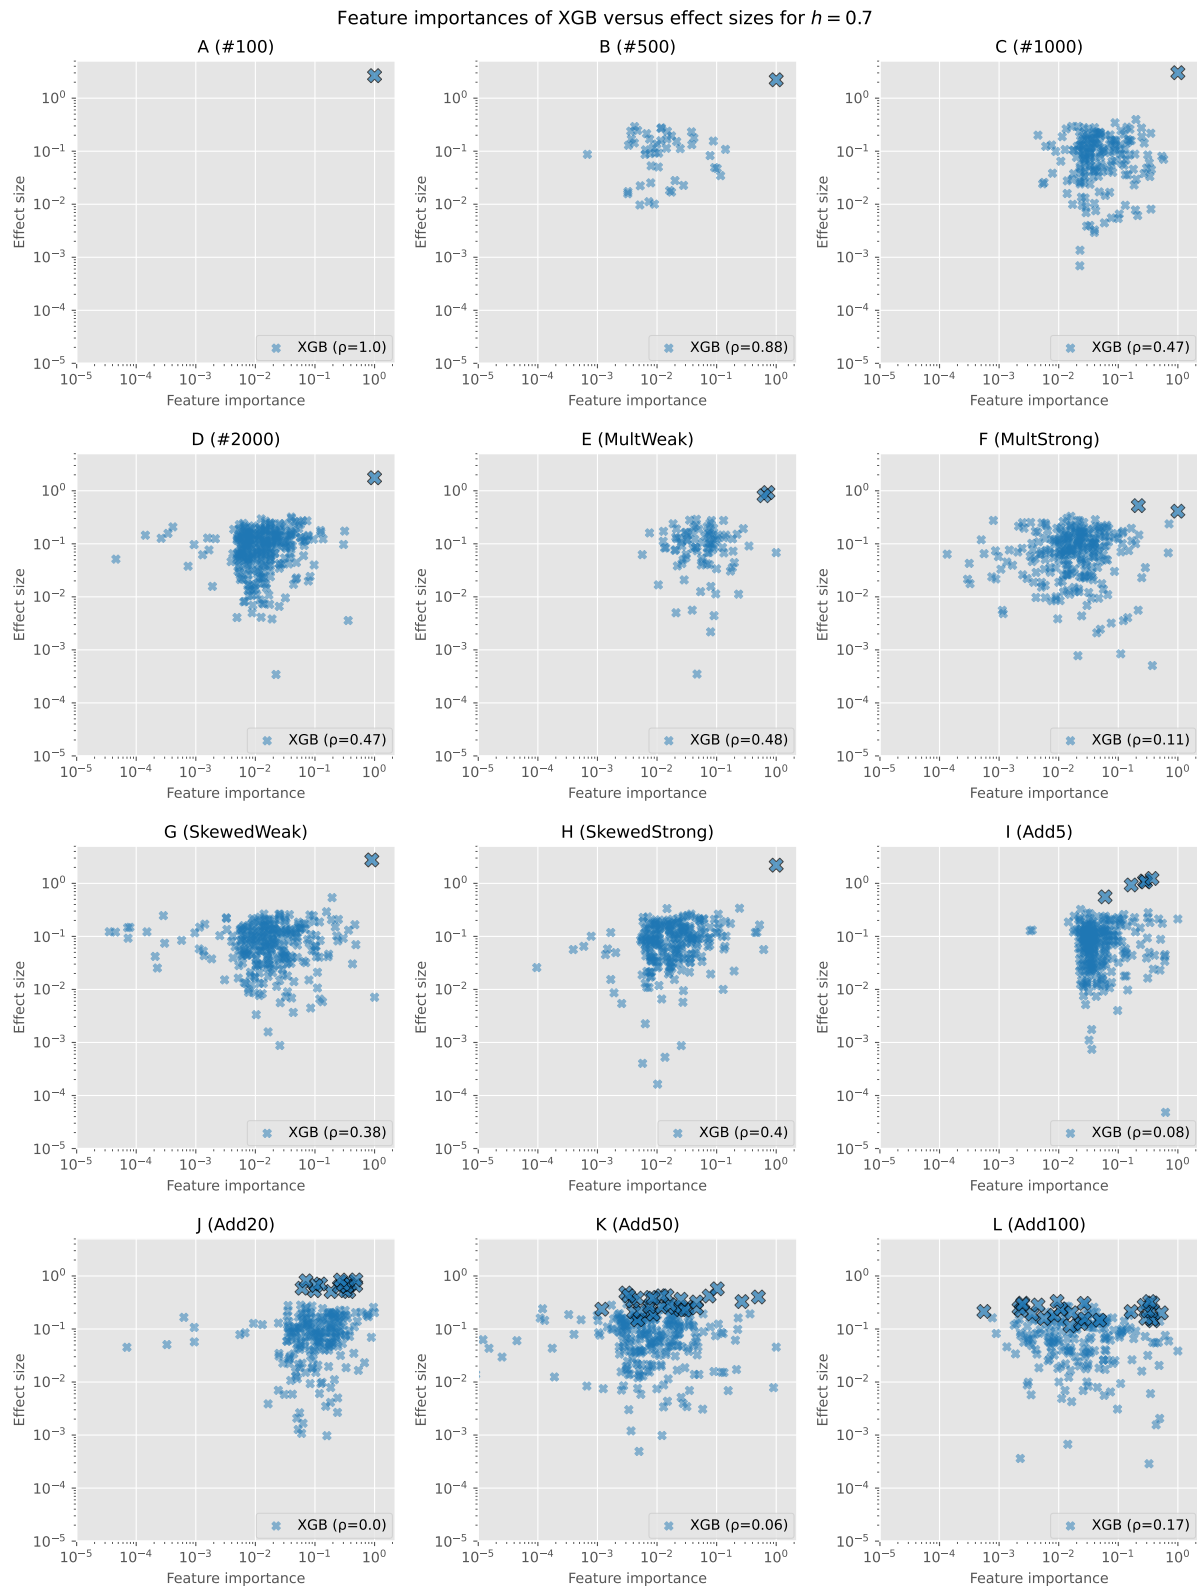

**Figure S11. Min-max normalized feature importances of XGB with effect sizes on synthetic data for  $h = 0.7$ :** Each subplot shows the results of one of the simulation configurations on a logarithmic scale. Only SNPs for which both the effect size as well as the feature importance are not zero are shown. Causal SNPs are highlighted by a larger marker size and a black frame. The legend additionally gives the Pearson correlation coefficient of the effect sizes and feature importances.

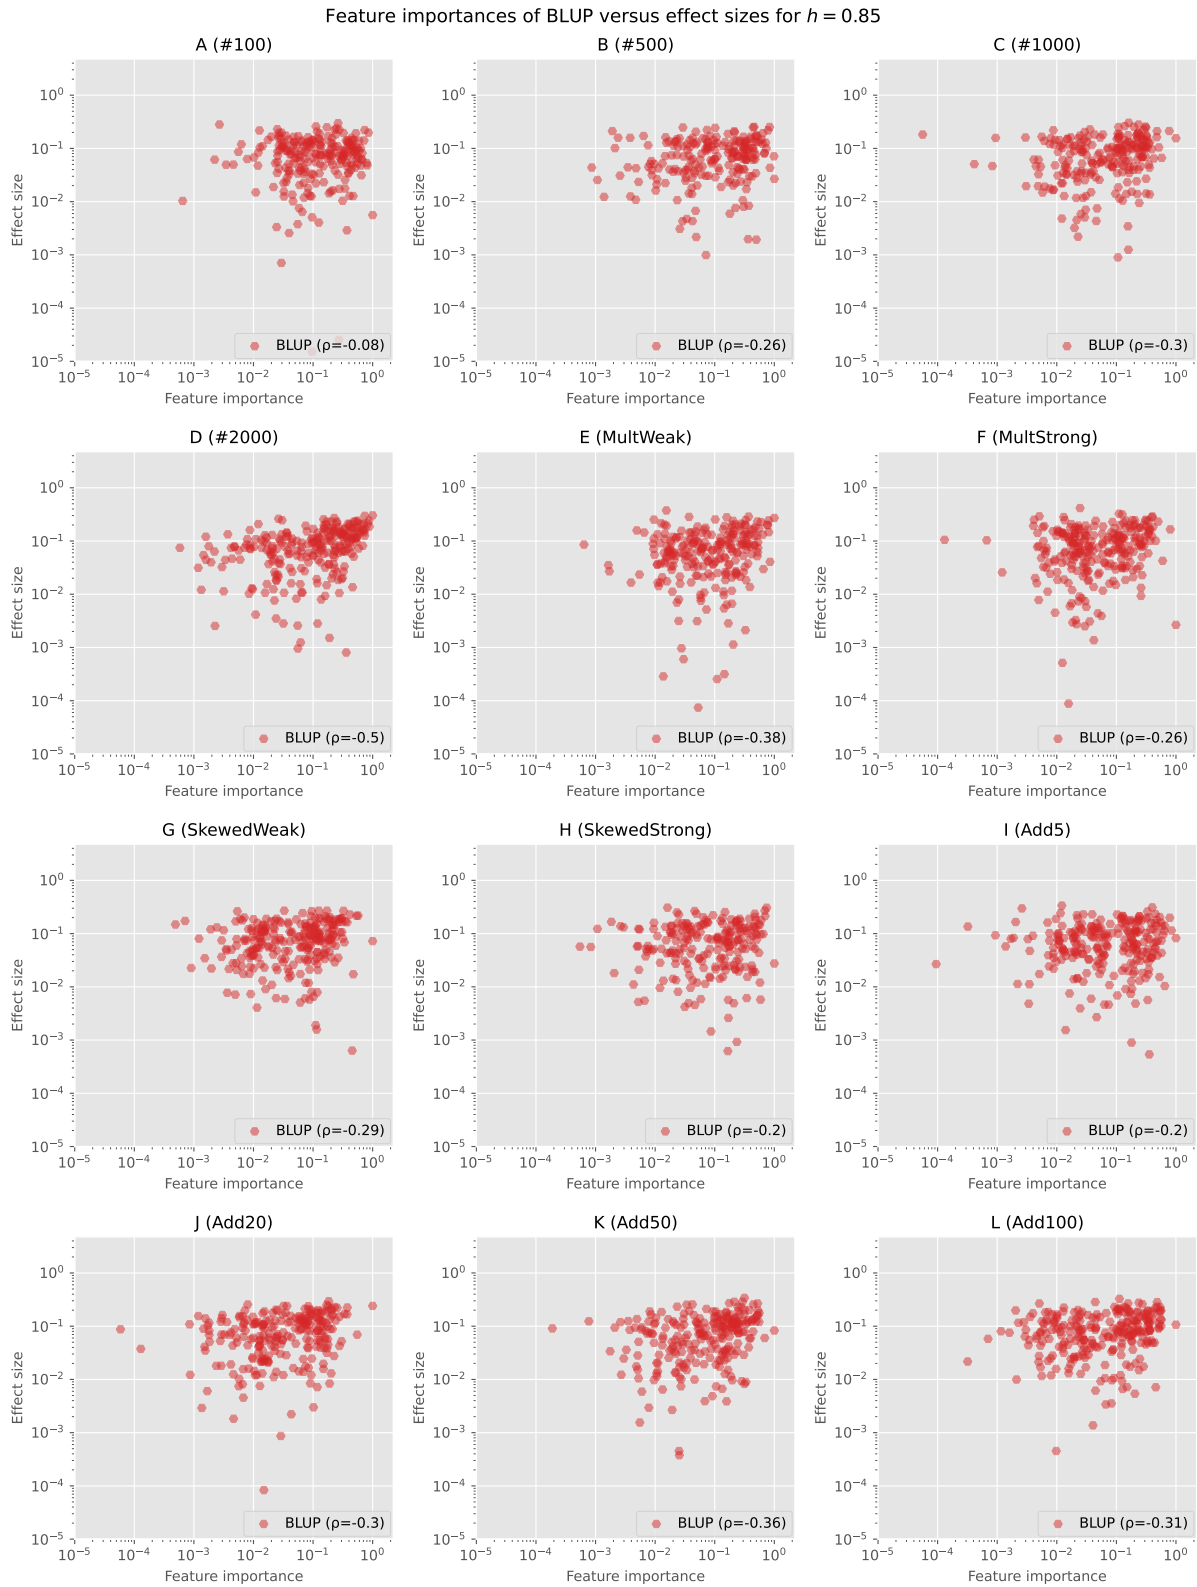

**Figure S12. Min-max normalized feature importances of RR-BLUP with effect sizes on synthetic data for  $h = 0.85$ :** Each subplot shows the results of one of the simulation configurations on a logarithmic scale. Only SNPs for which both the effect size as well as the feature importance are not zero are shown. Causal SNPs are highlighted by a larger marker size and a black frame. The legend additionally gives the Pearson correlation coefficient of the effect sizes and feature importances.

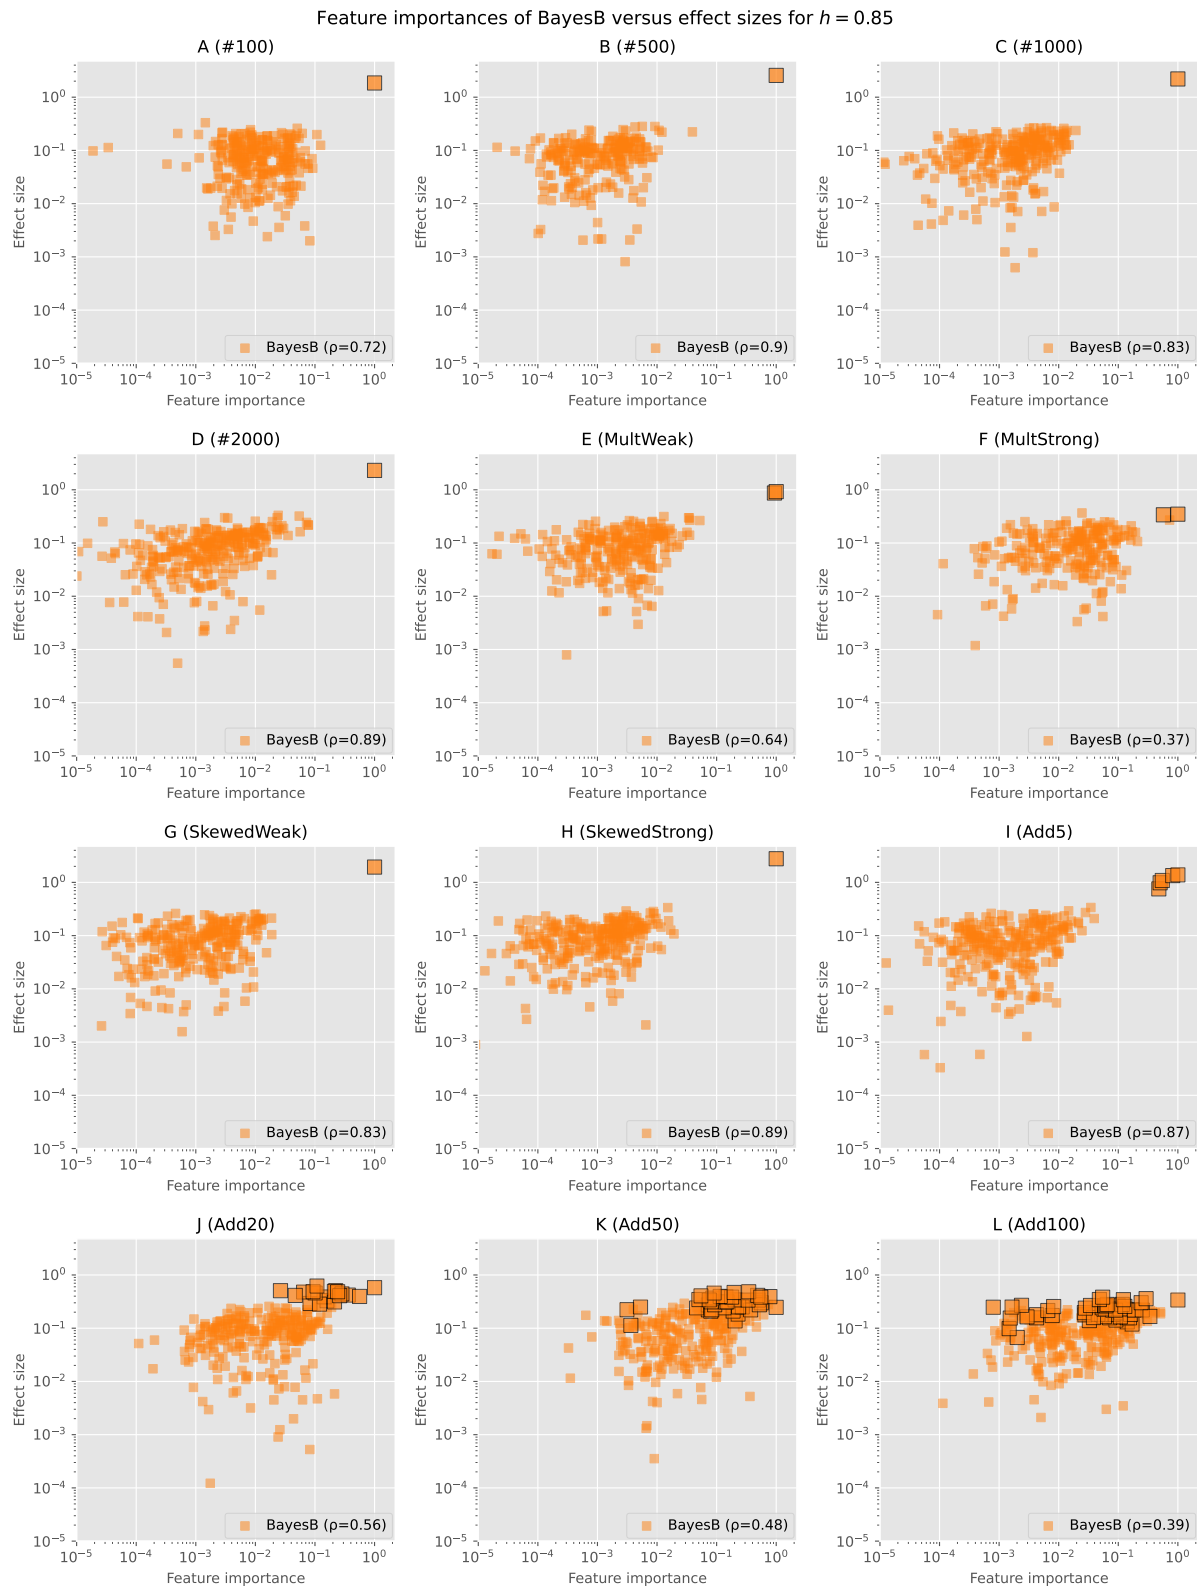

**Figure S13. Min-max normalized feature importances of BayesB with effect sizes on synthetic data for  $h = 0.85$ :** Each subplot shows the results of one of the simulation configurations on a logarithmic scale. Only SNPs for which both the effect size as well as the feature importance are not zero are shown. Causal SNPs are highlighted by a larger marker size and a black frame. The legend additionally gives the Pearson correlation coefficient of the effect sizes and feature importances.

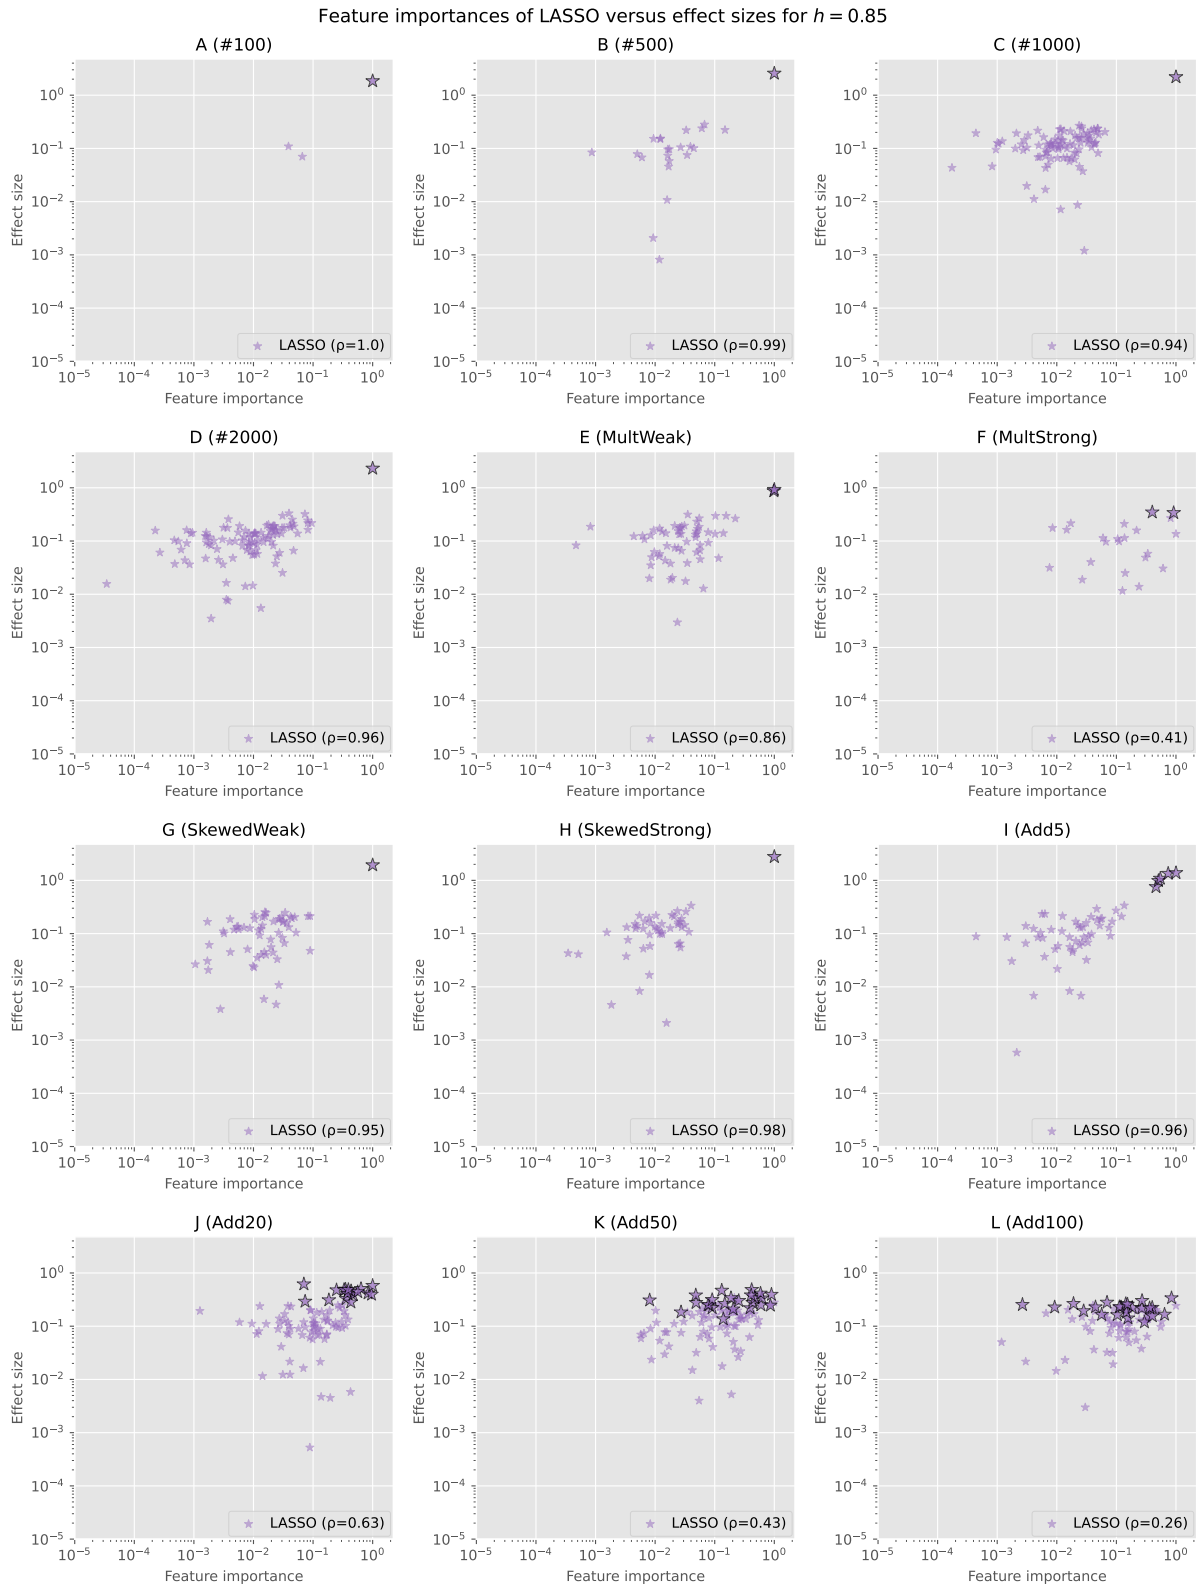

**Figure S14. Min-max normalized feature importances of LASSO with effect sizes on synthetic data for  $h = 0.85$ :** Each subplot shows the results of one of the simulation configurations on a logarithmic scale. Only SNPs for which both the effect size as well as the feature importance are not zero are shown. Causal SNPs are highlighted by a larger marker size and a black frame. The legend additionally gives the Pearson correlation coefficient of the effect sizes and feature importances.

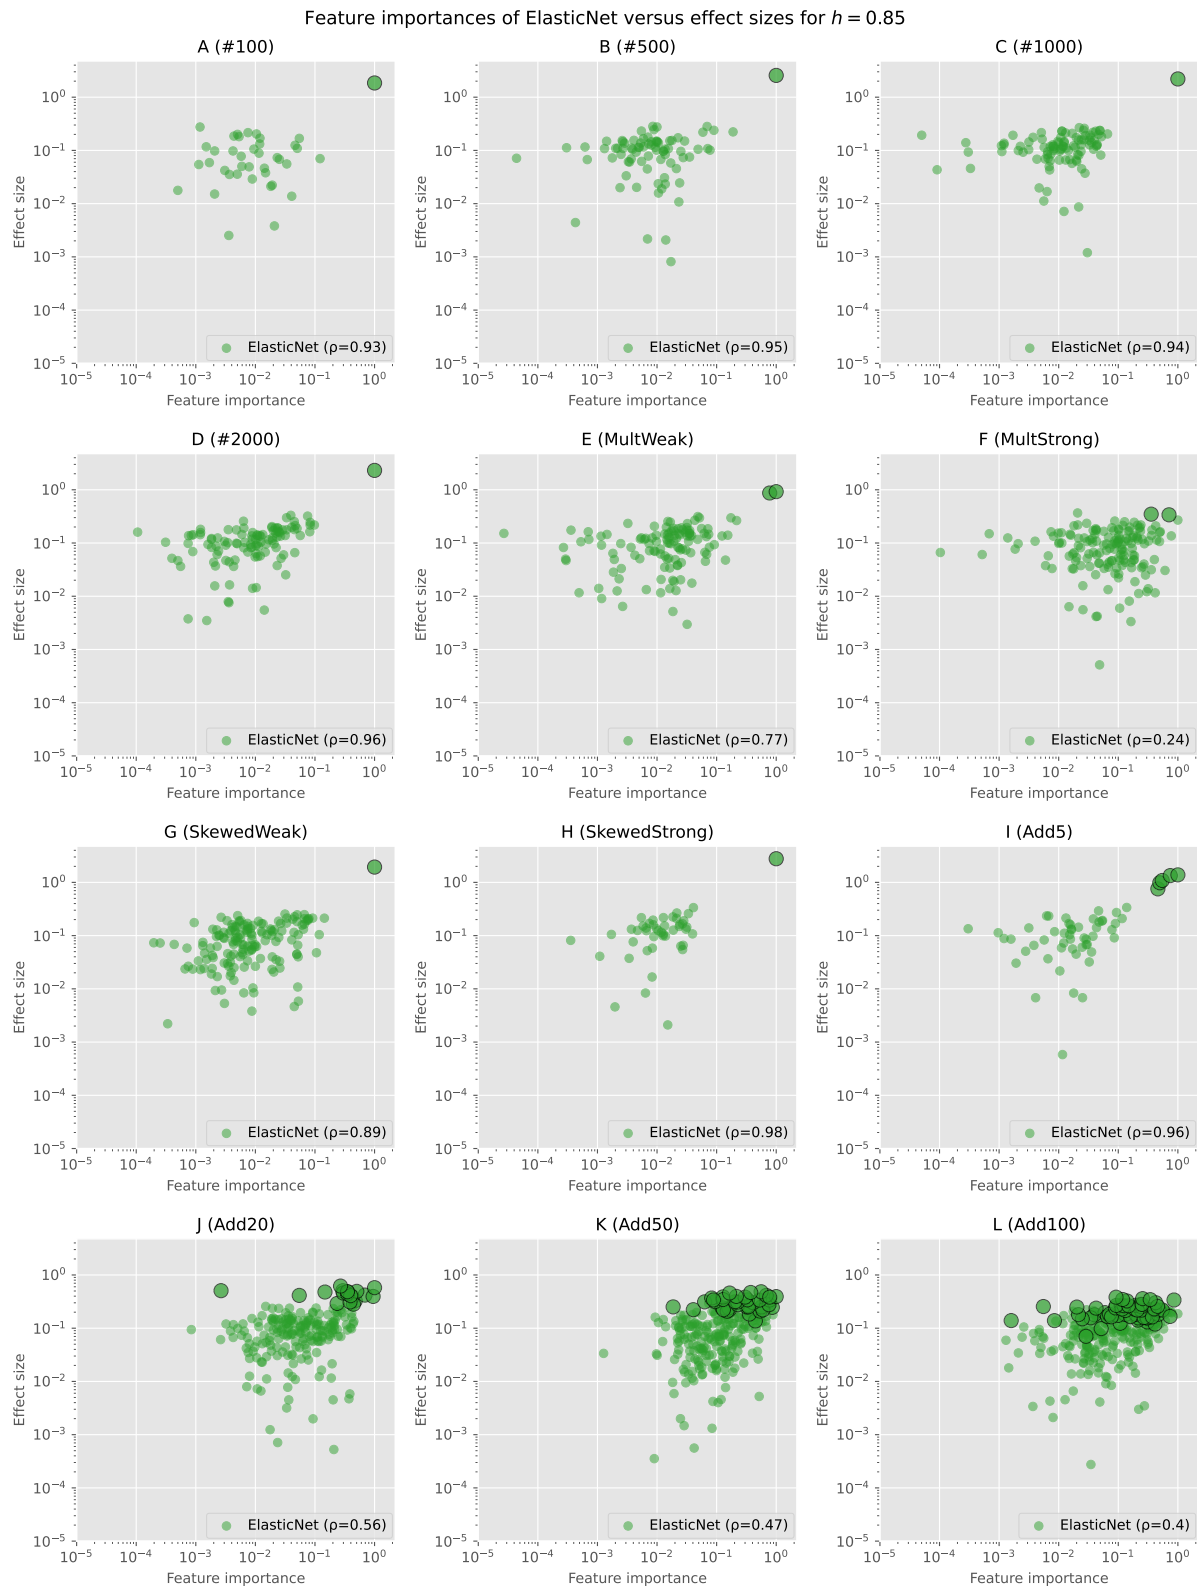

**Figure S15. Min-max normalized feature importances of ElasticNet with effect sizes on synthetic data for  $h = 0.85$ :** Each subplot shows the results of one of the simulation configurations on a logarithmic scale. Only SNPs for which both the effect size as well as the feature importance are not zero are shown. Causal SNPs are highlighted by a larger marker size and a black frame. The legend additionally gives the Pearson correlation coefficient of the effect sizes and feature importances.

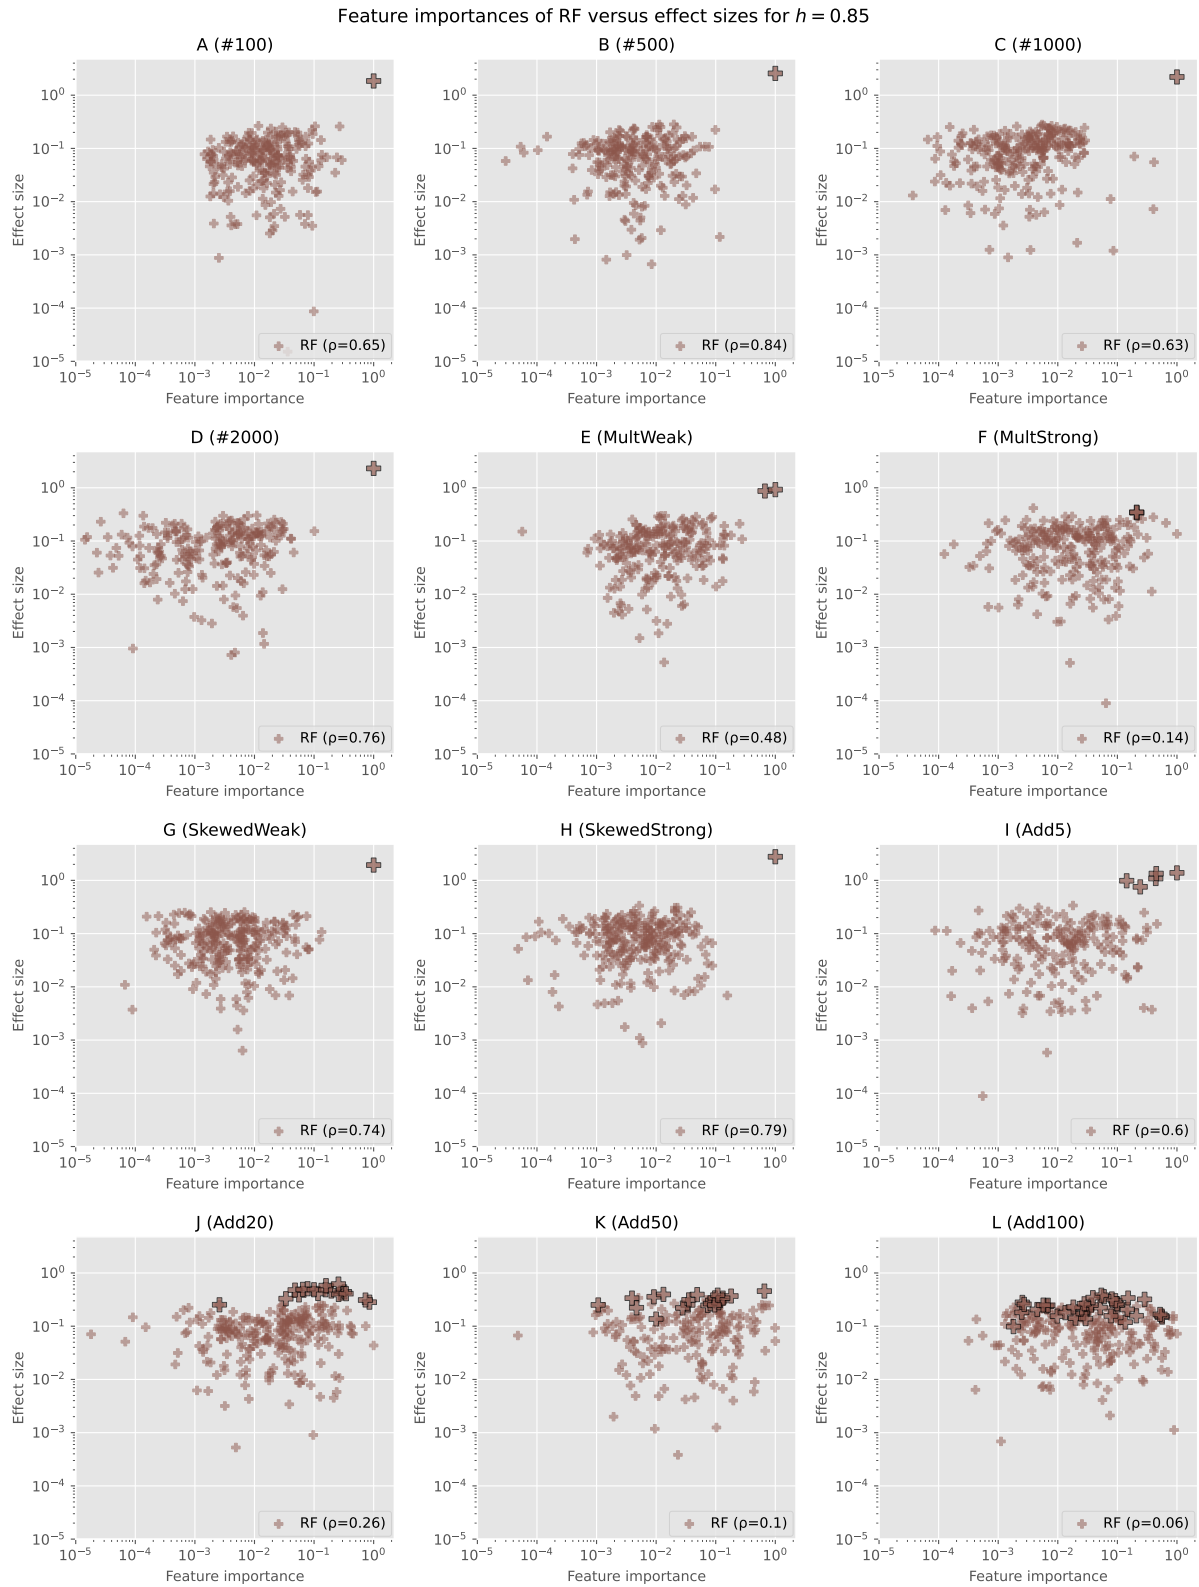

**Figure S16. Min-max normalized feature importances of RF with effect sizes on synthetic data for  $h = 0.85$ :** Each subplot shows the results of one of the simulation configurations on a logarithmic scale. Only SNPs for which both the effect size as well as the feature importance are not zero are shown. Causal SNPs are highlighted by a larger marker size and a black frame. The legend additionally gives the Pearson correlation coefficient of the effect sizes and feature importances.



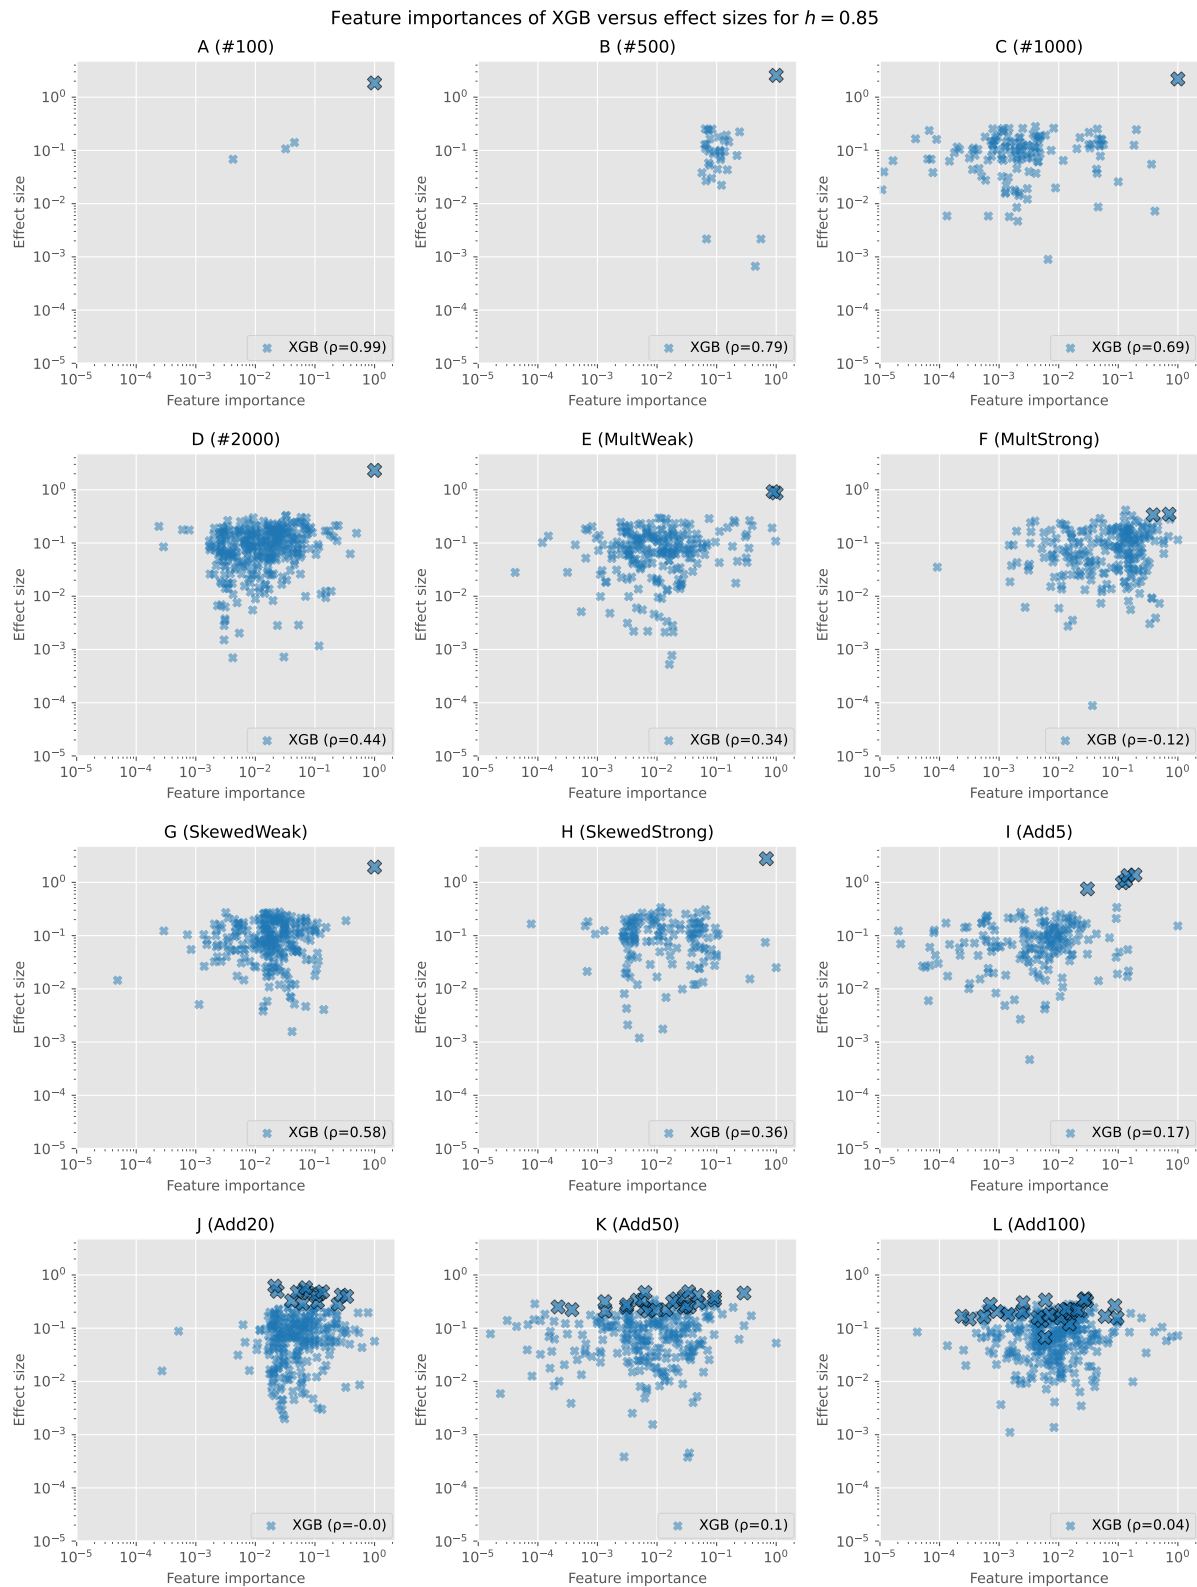

**Figure S17. Min-max normalized feature importances of XGB with effect sizes on synthetic data for  $h = 0.85$ :** Each subplot shows the results of one of the simulation configurations on a logarithmic scale. Only SNPs for which both the effect size as well as the feature importance are not zero are shown. Causal SNPs are highlighted by a larger marker size and a black frame. The legend additionally gives the Pearson correlation coefficient of the effect sizes and feature importances.

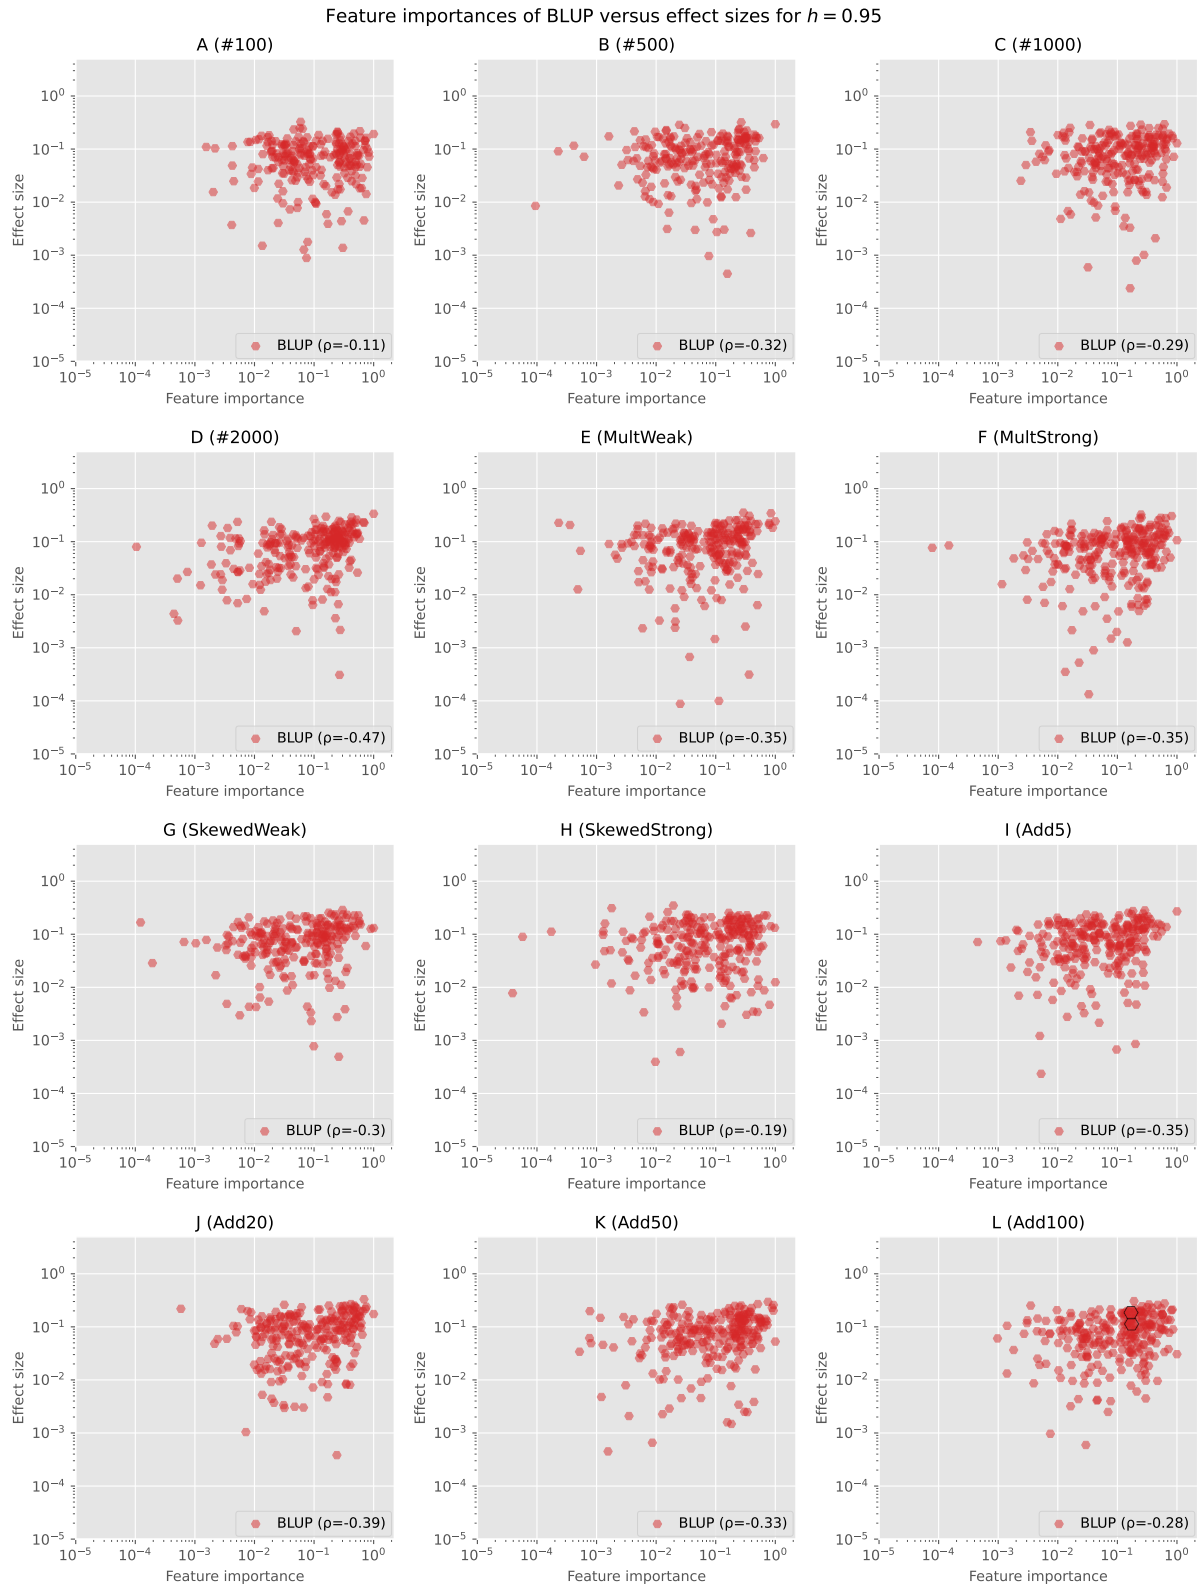

**Figure S18. Min-max normalized feature importances of RR-BLUP with effect sizes on synthetic data for  $h = 0.95$ :** Each subplot shows the results of one of the simulation configurations on a logarithmic scale. Only SNPs for which both the effect size as well as the feature importance are not zero are shown. Causal SNPs are highlighted by a larger marker size and a black frame. The legend additionally gives the Pearson correlation coefficient of the effect sizes and feature importances.

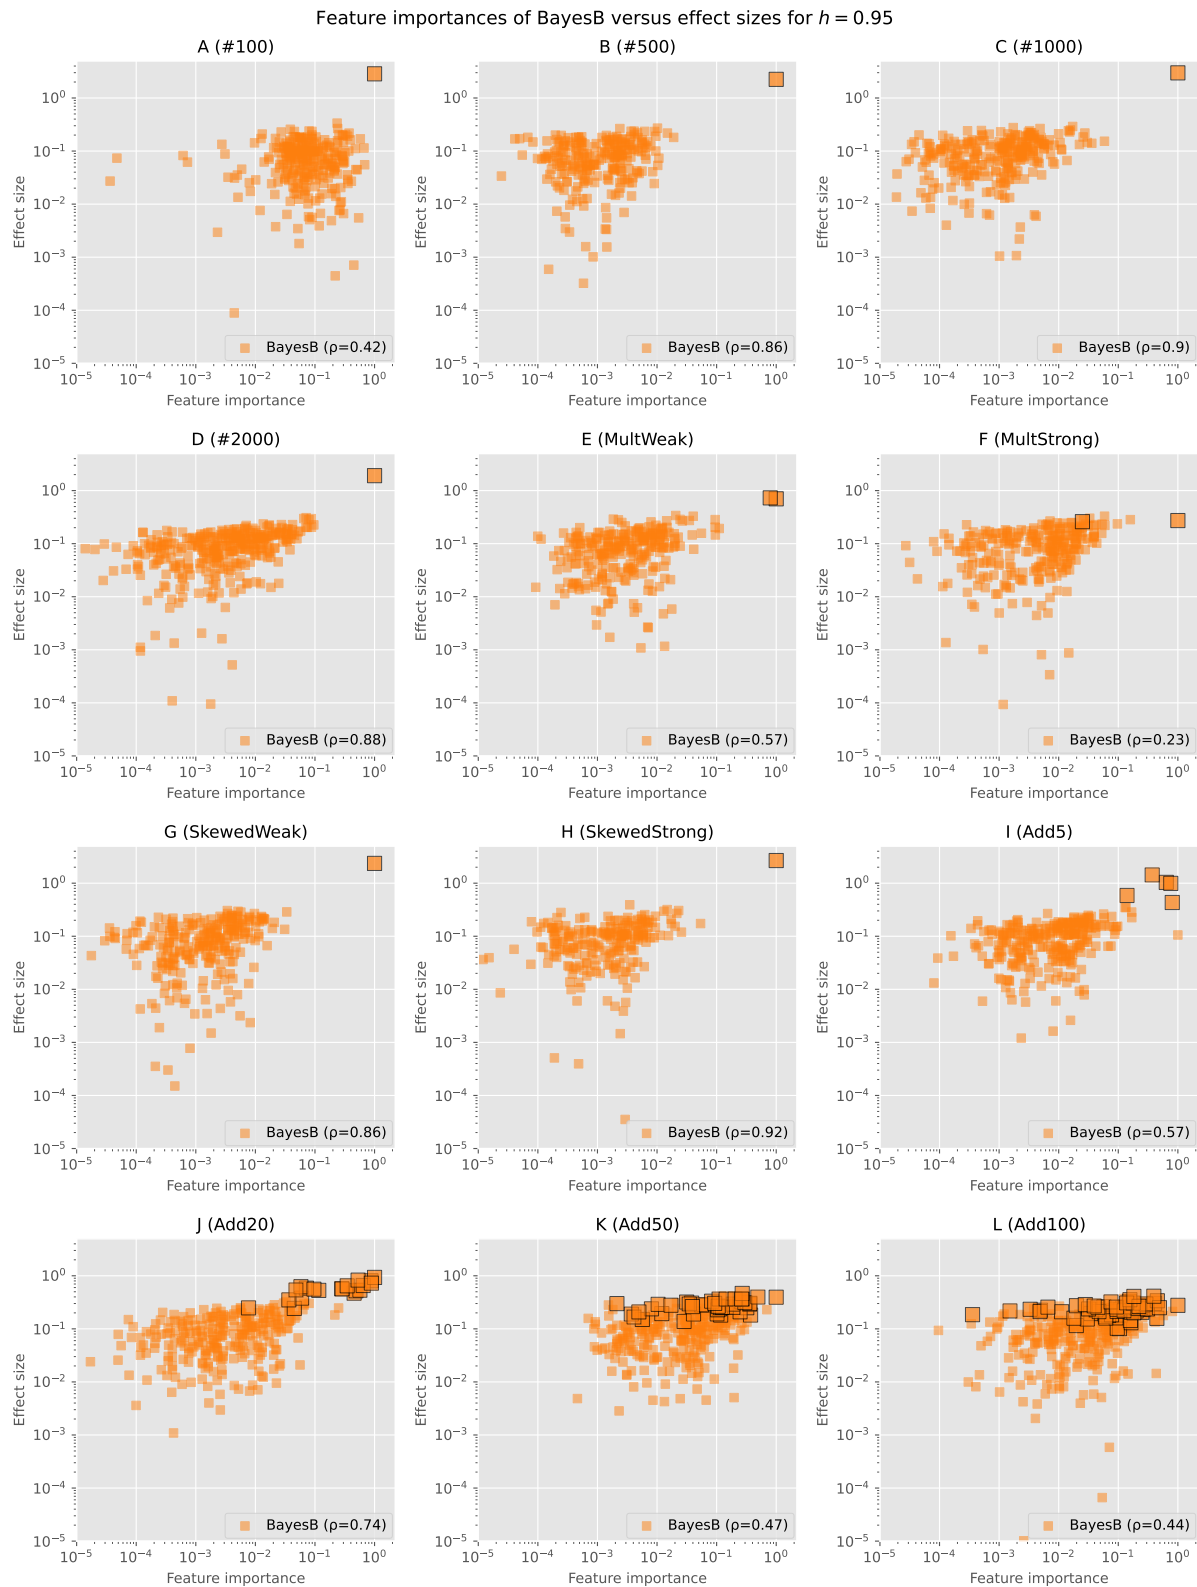

**Figure S19. Min-max normalized feature importances of BayesB with effect sizes on synthetic data for  $h = 0.95$ :** Each subplot shows the results of one of the simulation configurations on a logarithmic scale. Only SNPs for which both the effect size as well as the feature importance are not zero are shown. Causal SNPs are highlighted by a larger marker size and a black frame. The legend additionally gives the Pearson correlation coefficient of the effect sizes and feature importances.

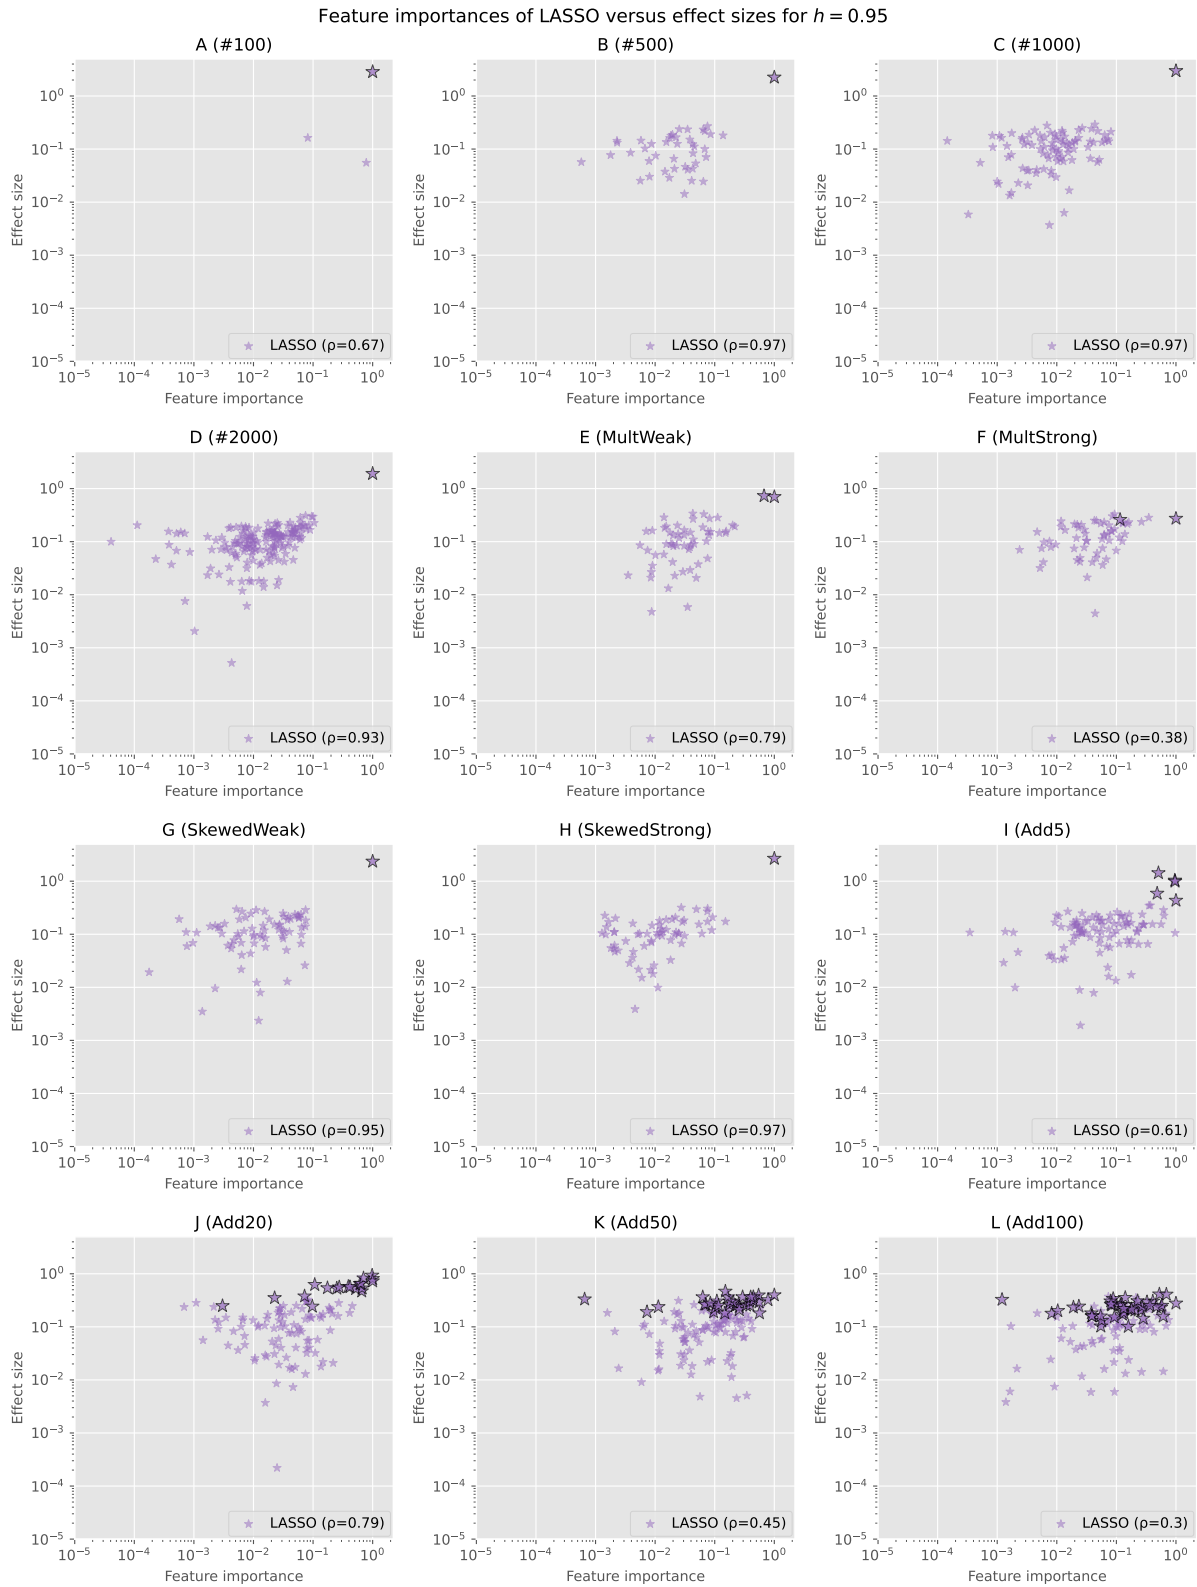

**Figure S20. Min-max normalized feature importances of LASSO with effect sizes on synthetic data for  $h = 0.95$ :** Each subplot shows the results of one of the simulation configurations on a logarithmic scale. Only SNPs for which both the effect size as well as the feature importance are not zero are shown. Causal SNPs are highlighted by a larger marker size and a black frame. The legend additionally gives the Pearson correlation coefficient of the effect sizes and feature importances.

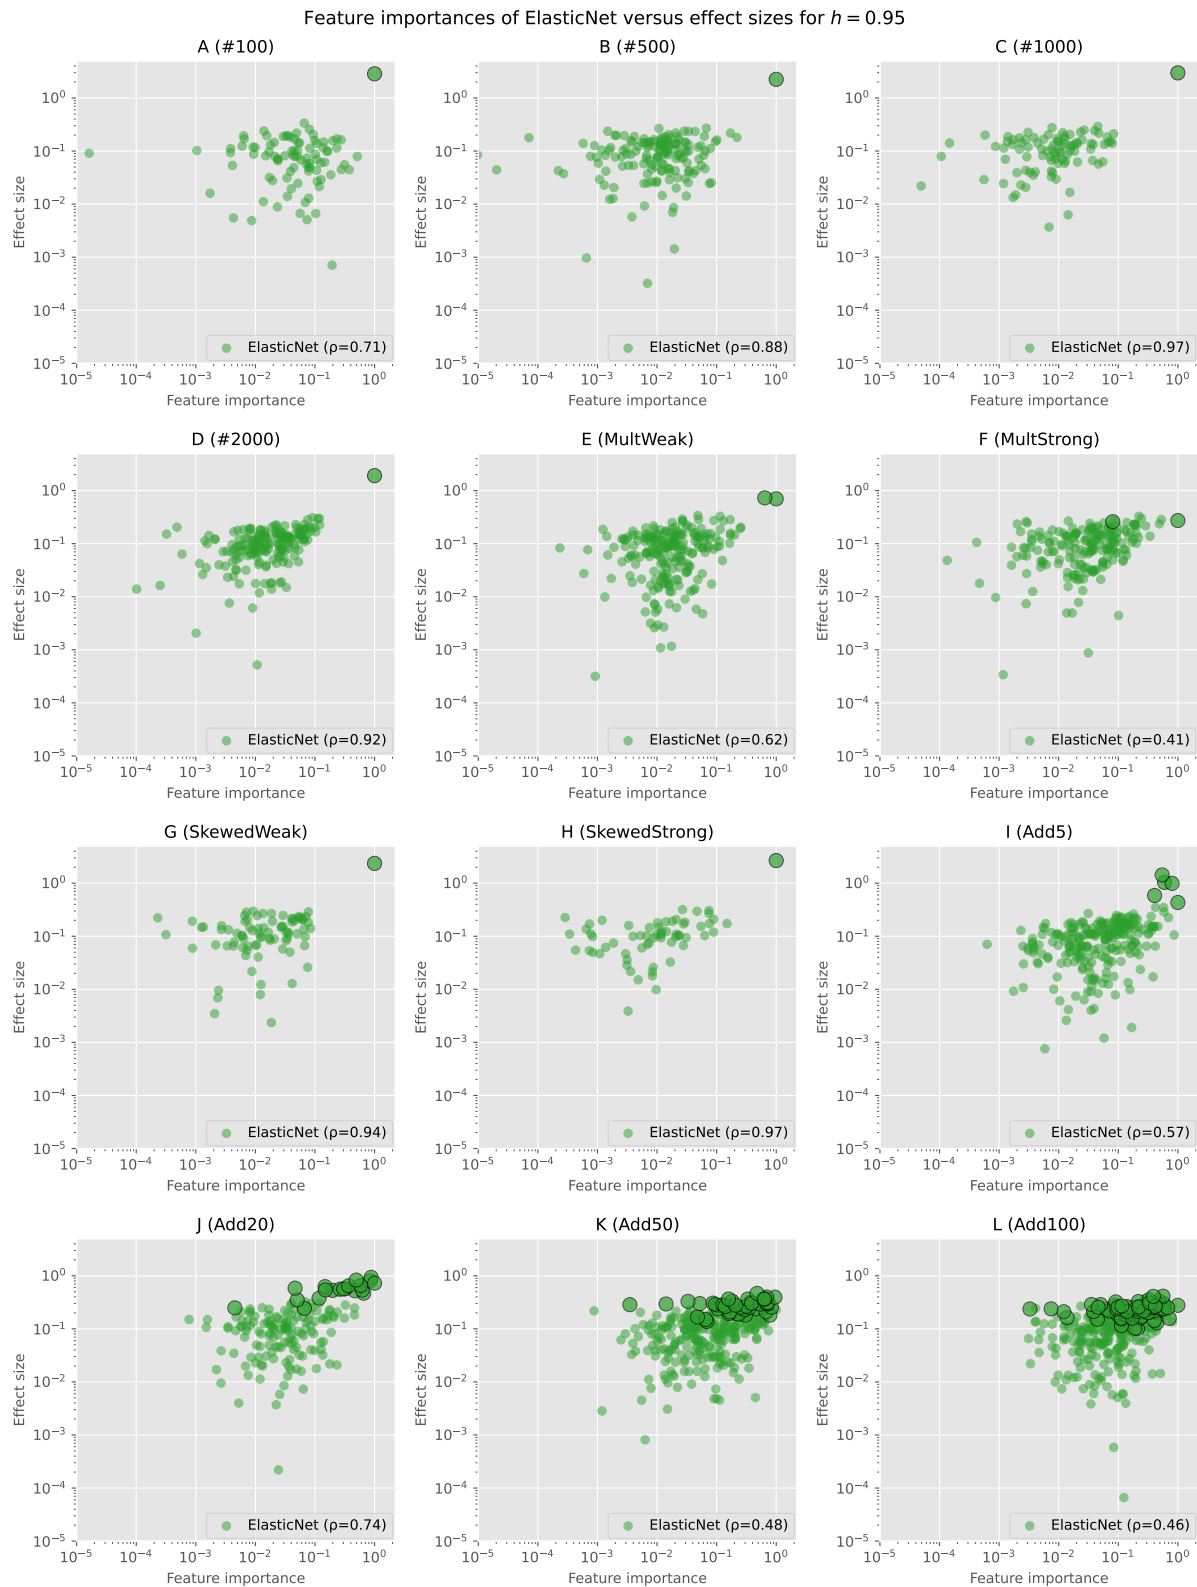

**Figure S21. Min-max normalized feature importances of ElasticNet with effect sizes on synthetic data for  $h = 0.95$ :** Each subplot shows the results of one of the simulation configurations on a logarithmic scale. Only SNPs for which both the effect size as well as the feature importance are not zero are shown. Causal SNPs are highlighted by a larger marker size and a black frame. The legend additionally gives the Pearson correlation coefficient of the effect sizes and feature importances.

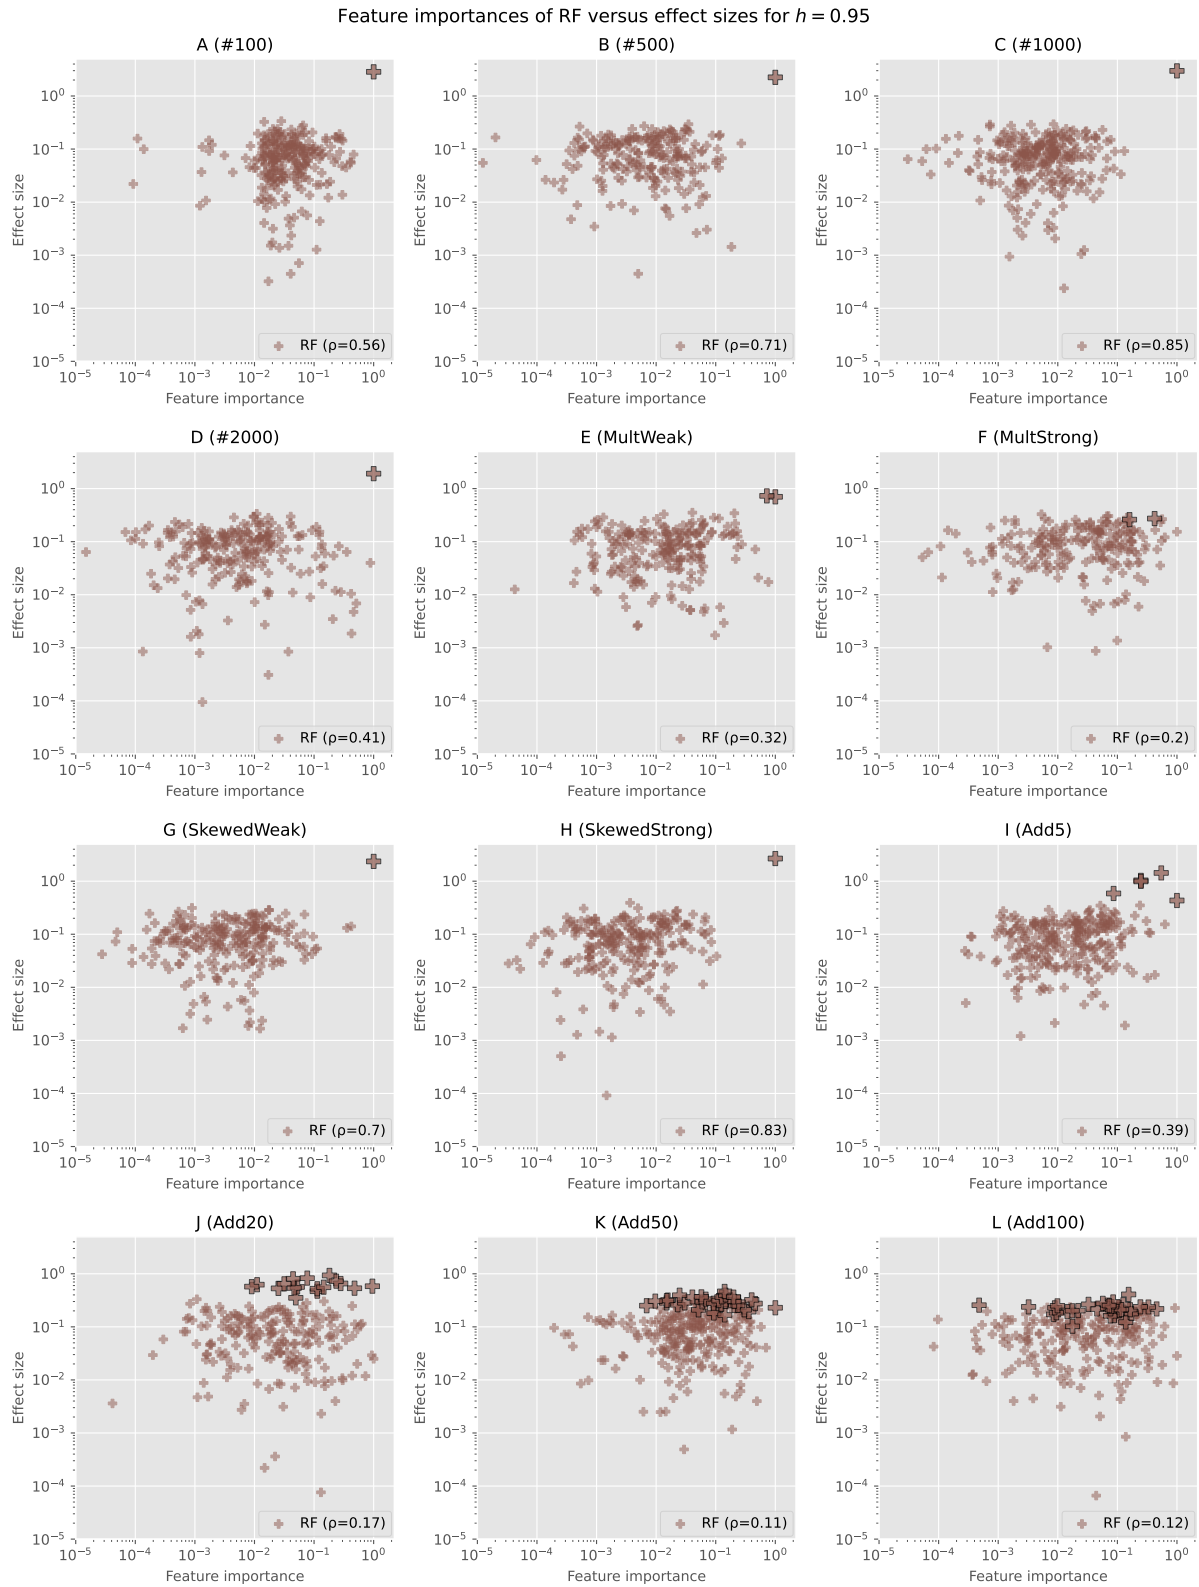

**Figure S22. Min-max normalized feature importances of RF with effect sizes on synthetic data for  $h = 0.95$ :** Each subplot shows the results of one of the simulation configurations on a logarithmic scale. Only SNPs for which both the effect size as well as the feature importance are not zero are shown. Causal SNPs are highlighted by a larger marker size and a black frame. The legend additionally gives the Pearson correlation coefficient of the effect sizes and feature importances.

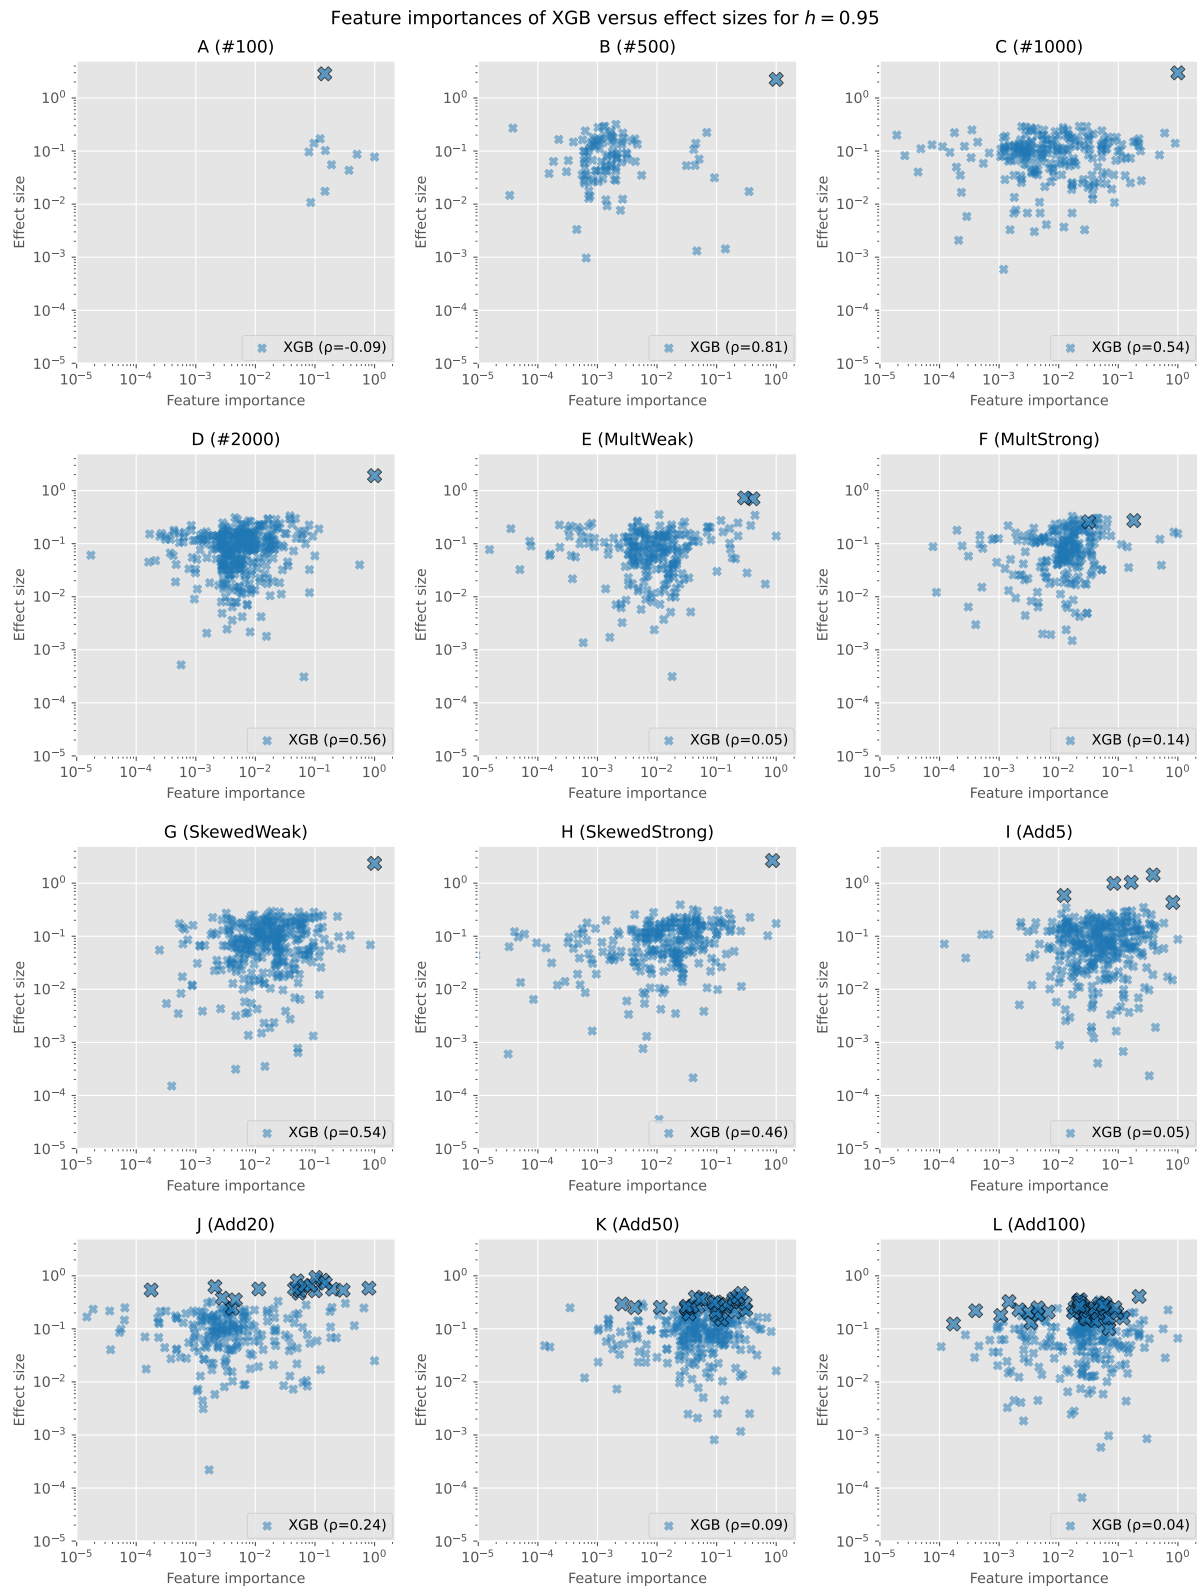

**Figure S23. Min-max normalized feature importances of XGB with effect sizes on synthetic data for  $h = 0.95$ :** Each subplot shows the results of one of the simulation configurations on a logarithmic scale. Only SNPs for which both the effect size as well as the feature importance are not zero are shown. Causal SNPs are highlighted by a larger marker size and a black frame. The legend additionally gives the Pearson correlation coefficient of the effect sizes and feature importances.

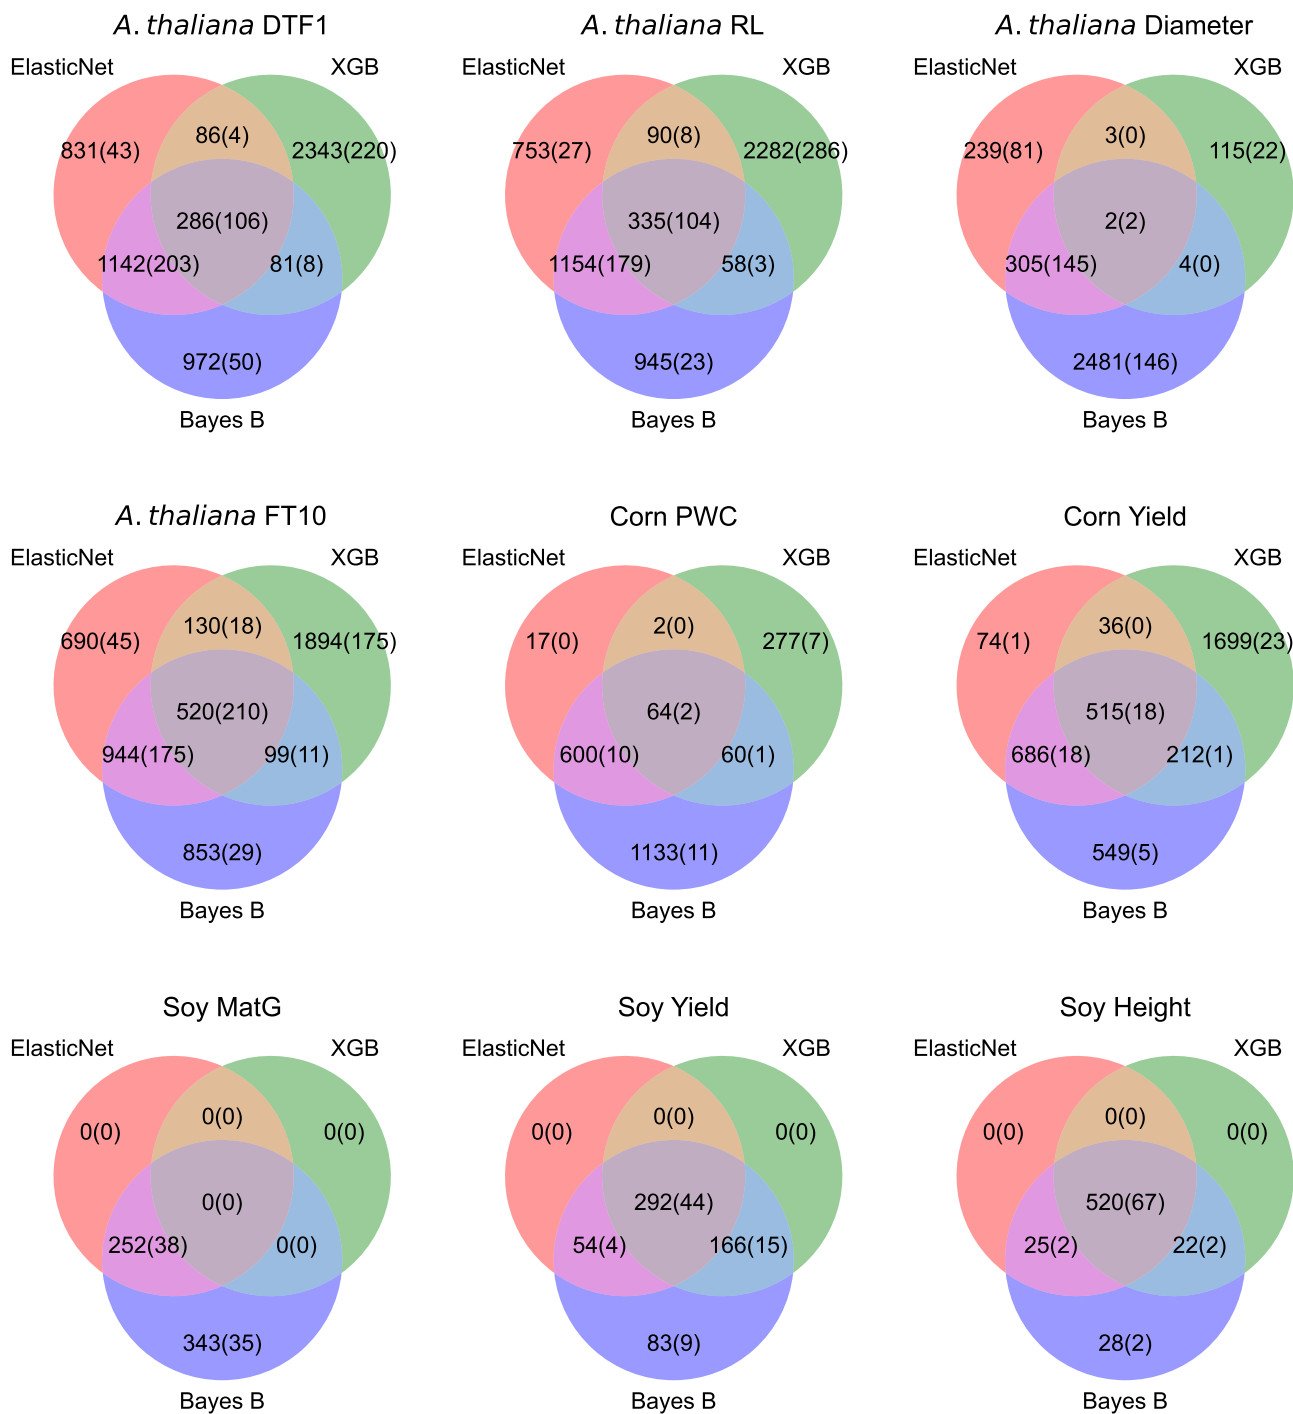

**Figure S24. Comparison of feature importance of ElasticNet, Bayes B and XGB for all real-world phenotypes:** Each subplot shows the number of important SNPs for the respective model. A SNP is considered important if its related model parameter differs from zero in at least one outer fold of the nested cross-validation. In parenthesis the number of markers is shown which were also among the top 1 000 GWAS results for *Arabidopsis thaliana*, respective top 100 GWAS results for corn and soy.



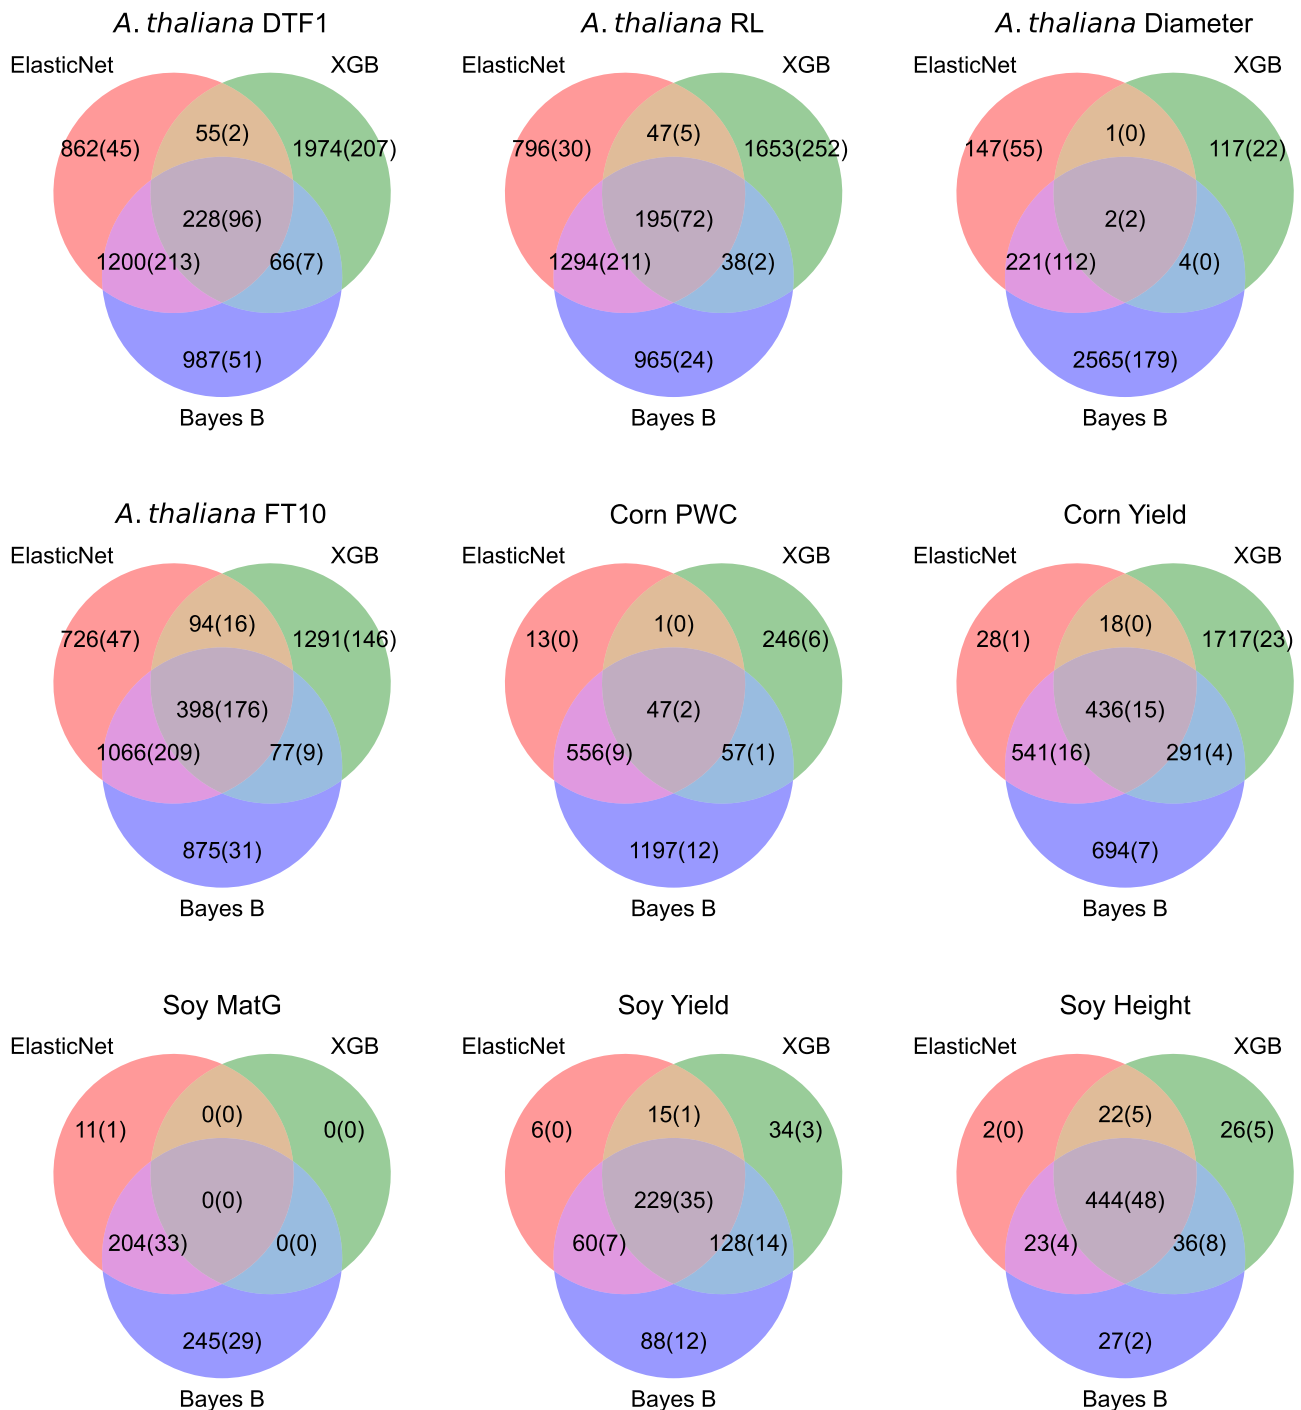

**Figure S25. Comparison of feature importance of ElasticNet, Bayes B and XGB for all real-world phenotypes with filtering out those with an importance less than one percentage of the largest value:** Each subplot shows the number of important SNPs for the respective model after removing those features that are smaller than one percent of the largest feature importance. A SNP is considered important if its related model parameter differs from zero in at least one outer fold of the nested cross-validation. In parenthesis the number of markers is shown which were also among the top 1000 GWAS results for *Arabidopsis thaliana*, respective top 100 GWAS results for corn and soy.
